# Supplementary material
Source: HighWire-hosted journal article supplement (https://learnmem.cshlp.org/content/suppl/2023/10/04/30.10.260)
Supplement: Supplemental_Dataset_1.docx [file Supplemental_Dataset_1.docx]

**Dataset1 (percentage of time spent in target quadrant)**

**Figure 1 (adenosine dose curve)**

| Test 24h post-training | | | | |
| --- | --- | --- | --- | --- |
| Saline | A 0.1 nmol | A 1 nmol | A 10 nmol | A 100 nmol |
| 50.0 | 43.3 | 43.3 | 38.3 | 30.0 |
| 25.0 | 41.7 | 35.0 | 50.0 | 33.3 |
| 36.7 | 45.0 | 36.7 | 41.7 | 46.7 |
| 40.0 | 56.7 | 43.3 | 38.3 | 38.3 |
| 41.7 | 61.7 | 55.0 | 40.0 | 45.0 |
| 38.3 | 53.3 | 40.0 | 31.7 | 48.3 |
| 45.0 | 53.3 | 40.0 | 33.3 | 43.3 |
| 55.0 |  | 41.7 | 48.3 | 33.3 |
| 46.7 |  | 55.0 | 60.0 | 36.7 |
| 56.7 |  | 36.7 | 43.3 | 40.0 |
| 41.7 |  |  | 40.0 | 33.3 |
| 75.0 |  |  | 51.7 | 51.7 |

| Test 24h post-first-test | | | | |
| --- | --- | --- | --- | --- |
| Saline | A 0.1 nmol | A 1 nmol | A 10 nmol | A 100 nmol |
| 66.7 | 61.7 | 3.3 | 13.3 | 20.0 |
| 41.7 | 23.3 | 31.7 | 20.0 | 8.3 |
| 28.3 | 35.0 | 33.3 | 16.7 | 13.3 |
| 28.3 | 33.3 | 33.3 | 40.0 | 16.7 |
| 43.3 | 60.0 | 33.3 | 13.3 | 10.0 |
| 33.3 | 45.0 | 43.3 | 16.7 | 16.7 |
| 51.7 | 26.7 | 38.3 | 21.7 | 35.0 |
| 33.3 |  | 35.0 | 1.7 | 20.0 |
| 28.3 |  | 63.3 | 35.0 | 43.3 |
| 25.0 |  | 28.3 | 15.0 | 33.3 |
| 35.0 |  |  | 38.3 | 20.0 |
| 48.3 |  |  | 20.0 | 16.7 |

| Test 5d post-first-test | | | | |
| --- | --- | --- | --- | --- |
| Saline | A 0.1 nmol | A 1 nmol | A 10 nmol | A 100 nmol |
| 43.3 | 25.0 | 48.3 | 28.3 | 25.0 |
| 25.0 | 36.7 | 20.0 | 41.7 | 25.0 |
| 45.0 | 21.7 | 25.0 | 30.0 | 36.7 |
| 33.3 | 33.3 | 53.3 | 18.3 | 35.0 |
| 73.3 | 33.3 | 50.0 | 18.3 | 40.0 |
| 30.0 | 33.3 | 20.0 | 15.0 | 33.3 |
| 23.3 | 50.0 | 35.0 | 21.7 | 20.0 |
| 55.0 |  | 38.3 | 21.7 | 21.7 |
| 36.7 |  | 53.3 | 40.0 | 38.3 |
| 51.7 |  | 45.0 | 26.7 | 45.0 |
| 36.7 |  |  | 40.0 | 6.7 |
| 43.3 |  |  | 23.3 | 13.3 |

**Figure 2A (infusion control)**

| Test 24h post-infusion | | Test 5d post-infusion | |
| --- | --- | --- | --- |
| saline | A 10 nmol | saline | A 10 nmol |
| 28.3 | 40.0 | 33.3 | 38.3 |
| 41.7 | 41.7 | 25.0 | 55.0 |
| 45.0 | 53.3 | 11.7 | 45.0 |
| 43.3 | 43.3 | 73.3 | 50.0 |
| 33.3 | 46.7 | 30.0 | 46.7 |
| 51.7 | 48.3 | 23.3 | 45.0 |
| 33.3 | 41.7 | 55.0 | 43.3 |
| 28.3 | 58.3 | 36.7 | 50.0 |
| 45.0 | 41.7 | 51.7 | 41.7 |
| 35.0 | 43.3 | 36.7 | 45.0 |
| 48.3 |  | 43.3 |  |

**Figure 2B (reinforcement control)**

| Test 24h post-reinforcement | | Test 5d post-reinforcement | |
| --- | --- | --- | --- |
| saline | A 10 nmol | saline | A 10 nmol |
| 66.7 | 30.0 | 43.3 | 50.0 |
| 41.7 | 31.7 | 25.0 | 36.7 |
| 28.3 | 45.0 | 45.0 | 20.0 |
| 15.0 | 40.0 | 25.0 | 50.0 |
| 45.3 | 38.3 | 71.3 | 55.0 |
| 34.3 | 55.0 | 30.0 | 43.3 |
| 51.7 |  | 26.3 |  |
| 36.3 |  | 52.0 |  |
| 25.3 |  | 33.7 |  |
| 27.0 |  | 49.7 |  |
| 33.0 |  | 33.7 |  |

**Figure 2C (temporal control)**

| Test 24h post-training | | Test 24h post-first-test | | Test 5d post-first-test | |
| --- | --- | --- | --- | --- | --- |
| saline | A 10 nmol | saline | A 10 nmol | saline | A 10 nmol |
| 50.0 | 56.7 | 66.7 | 46.7 | 43.3 | 41.7 |
| 36.7 | 50.0 | 28.3 | 45.0 | 45.0 | 41.7 |
| 40.0 | 41.7 | 28.3 | 45.0 | 33.3 | 40.0 |
| 36.7 | 58.3 | 41.7 | 56.7 | 25.0 | 58.3 |
| 48.3 | 50.0 | 25.0 | 45.0 | 50.0 | 45.0 |
| 41.7 | 53.3 | 43.3 | 53.3 | 73.3 | 55.0 |
|  | 46.7 |  | 63.3 |  | 73.3 |
|  | 51.7 |  | 50.0 |  | 45.0 |

**Figure 2D (structure control)**

| Test 24h post-training | | Test 24h post-first-test | | Test 5d post-first-test | |
| --- | --- | --- | --- | --- | --- |
| saline | A 10 nmol | saline | A 10 nmol | saline | A 10 nmol |
| 41.7 | 41.7 | 43.3 | 36.7 | 73.3 | 46.7 |
| 38.3 | 35.0 | 33.3 | 46.7 | 30.0 | 41.7 |
| 45.0 | 41.7 | 51.7 | 58.3 | 23.3 | 61.7 |
| 55.0 | 53.3 | 33.3 | 56.7 | 55.0 | 45.0 |
| 46.7 | 43.3 | 28.3 | 41.7 | 36.7 | 41.7 |
| 41.7 | 50.0 | 35.0 | 68.3 | 36.7 | 46.7 |
| 75.0 |  | 48.3 |  | 43.3 |  |

**Figure 3 (adenosine + antagonists)**

| Test 24h post-training | | | | | |
| --- | --- | --- | --- | --- | --- |
| Saline | A 10 nmol | A + antag-A1 | A + antag -A2A | A + antag-A2B | A + antag-A3 |
| 50.0 | 38.3 | 35.0 | 51.7 | 46.7 | 51.7 |
| 25.0 | 50.0 | 43.3 | 43.3 | 63.3 | 45.0 |
| 36.7 | 41.7 | 68.3 | 41.7 | 50.0 | 41.7 |
| 40.0 | 38.3 | 38.3 | 38.3 | 45.0 | 45.0 |
| 41.7 | 40.0 | 41.7 | 55.0 | 35.0 | 61.7 |
| 38.3 | 31.7 | 45.0 | 46.7 | 50.0 | 51.7 |
| 45.0 | 33.3 | 50.0 | 40.0 | 40.0 | 41.7 |
| 55.0 | 48.3 | 40.0 | 53.3 | 41.7 | 63.3 |
| 46.7 | 60.0 | 61.7 | 38.3 | 56.7 | 66.7 |
| 56.7 | 43.3 | 41.7 | 45.0 |  | 46.7 |
| 41.7 | 40.0 | 41.7 | 56.7 |  | 53.3 |
| 75.0 | 51.7 | 53.3 | 68.3 |  | 55.0 |
|  |  | 46.7 | 56.7 |  | 46.7 |
|  |  |  |  |  | 76.7 |
|  |  |  |  |  | 43.3 |
|  |  |  |  |  | 63.3 |
|  |  |  |  |  | 60.0 |
|  |  |  |  |  | 48.3 |

| Test 24h post-first-test | | | | | |
| --- | --- | --- | --- | --- | --- |
| Saline | A 10 nmol | A + antag-A1 | A + antag -A2A | A + antag-A2B | A + antag-A3 |
| 66.7 | 13.3 | 23.3 | 26.7 | 20.0 | 25.0 |
| 41.7 | 20.0 | 38.3 | 5.0 | 26.7 | 16.7 |
| 28.3 | 16.7 | 41.7 | 33.3 | 13.3 | 51.7 |
| 28.3 | 40.0 | 41.7 | 6.7 | 21.0 | 33.3 |
| 43.3 | 13.3 | 41.7 | 18.3 | 20.0 | 23.3 |
| 33.3 | 16.7 | 36.7 | 25.0 | 31.7 | 31.7 |
| 51.7 | 21.7 | 25.0 | 33.3 | 38.3 | 33.3 |
| 33.3 | 1.7 | 30.0 | 25.0 | 31.7 | 23.3 |
| 28.3 | 35.0 | 46.7 | 30.0 | 28.3 | 23.3 |
| 25.0 | 15.0 | 18.3 | 40.0 |  | 30.0 |
| 35.0 | 38.3 | 33.3 | 21.7 |  | 26.7 |
| 48.3 | 20.0 | 38.3 | 26.7 |  | 35.0 |
|  |  | 36.7 | 45.0 |  | 48.3 |
|  |  |  |  |  | 56.7 |
|  |  |  |  |  | 23.3 |
|  |  |  |  |  | 56.7 |
|  |  |  |  |  | 51.7 |
|  |  |  |  |  | 35.0 |

| Test 5d post-first-test | | | | | |
| --- | --- | --- | --- | --- | --- |
| Saline | A 10 nmol | A + antag-A1 | A + antag -A2A | A + antag-A2B | A + antag-A3 |
| 43.3 | 28.3 | 13.3 | 33.3 | 28.3 | 35.0 |
| 25.0 | 41.7 | 36.7 | 18.3 | 10.0 | 46.7 |
| 45.0 | 30.0 | 33.3 | 26.7 | 28.3 | 10.0 |
| 33.3 | 18.3 | 16.7 | 25.0 | 23.3 | 38.3 |
| 73.3 | 18.3 | 28.3 | 10.0 | 8.3 | 48.3 |
| 30.0 | 15.0 | 35.0 | 35.0 | 18.3 | 36.7 |
| 23.3 | 21.7 | 43.3 | 15.0 | 10.0 | 48.3 |
| 55.0 | 21.7 | 38.3 | 35.0 | 20.0 | 31.7 |
| 36.7 | 40.0 | 41.7 | 11.7 | 41.7 | 33.3 |
| 51.7 | 26.7 | 20.0 | 56.7 |  | 36.7 |
| 36.7 | 40.0 | 30.0 | 30.0 |  | 10.0 |
| 43.3 | 23.3 | 51.7 | 13.3 |  | 50.0 |
|  |  | 41.7 | 33.3 |  | 21.7 |
|  |  |  |  |  | 56.7 |
|  |  |  |  |  | 21.7 |
|  |  |  |  |  | 38.3 |
|  |  |  |  |  | 28.3 |
|  |  |  |  |  | 23.3 |

**Figure 4 (antagonists)**

| Test 24h post-training | | | | |
| --- | --- | --- | --- | --- |
| saline | antag A1 | antag A2A | antag A2B | antag A3 |
| 50.0 | 48.3 | 51.7 | 56.7 | 43.3 |
| 25.0 | 58.3 | 45.0 | 60.0 | 50.0 |
| 36.7 | 48.3 | 41.7 | 48.3 | 66.7 |
| 40.0 | 58.3 | 60.0 | 51.7 | 43.3 |
| 41.7 | 41.7 | 50.0 | 63.3 | 73.3 |
| 38.3 | 48.3 | 65.0 | 56.7 | 66.7 |
| 45.0 | 48.3 | 80.0 | 48.3 | 63.3 |
| 55.0 | 53.3 | 58.3 | 58.3 | 45.0 |
| 46.7 | 46.7 |  |  | 51.7 |
| 56.7 | 66.7 |  |  | 46.7 |
| 41.7 | 41.7 |  |  | 48.3 |
| 75.0 | 48.3 |  |  | 43.3 |
|  | 58.3 |  |  | 41.7 |
|  | 50.0 |  |  | 41.7 |
|  | 51.7 |  |  | 41.7 |

| Test 24h post-first-test | | | | |
| --- | --- | --- | --- | --- |
| saline | antag A1 | antag A2A | antag A2B | antag A3 |
| 66.7 | 46.7 | 28.3 | 41.7 | 50.0 |
| 41.7 | 36.7 | 40.0 | 31.7 | 36.7 |
| 28.3 | 46.7 | 50.0 | 33.3 | 30.0 |
| 28.3 | 73.3 | 55.0 | 31.7 | 26.7 |
| 43.3 | 30.0 | 20.0 | 46.7 | 50.0 |
| 33.3 | 10.0 | 18.3 | 18.3 | 25.0 |
| 51.7 | 23.3 | 33.3 | 21.7 | 50.0 |
| 33.3 | 60.0 | 60.0 | 66.7 | 50.0 |
| 28.3 | 45.0 |  |  | 50.0 |
| 25.0 | 66.7 |  |  | 36.7 |
| 35.0 | 50.0 |  |  | 31.7 |
| 48.3 | 58.3 |  |  | 60.0 |
|  | 25.0 |  |  | 25.0 |
|  | 16.7 |  |  | 31.7 |
|  | 18.3 |  |  | 20.0 |

| Test 5d post-first-test | | | | |
| --- | --- | --- | --- | --- |
| saline | antag A1 | antag A2A | antag A2B | antag A3 |
| 43.3 | 33.3 | 25.0 | 36.7 | 41.7 |
| 25.0 | 56.7 | 23.3 | 40.0 | 75.0 |
| 45.0 | 33.3 | 50.0 | 35.0 | 20.0 |
| 33.3 | 45.0 | 53.3 | 40.0 | 81.7 |
| 73.3 | 16.7 | 23.3 | 36.7 | 66.7 |
| 30.0 | 20.0 | 10.0 | 20.0 | 41.7 |
| 23.3 | 16.7 | 93.3 | 36.7 | 55.0 |
| 55.0 | 55.0 | 46.7 | 28.3 | 48.3 |
| 36.7 | 25.0 |  |  | 41.7 |
| 51.7 | 38.3 |  |  | 31.7 |
| 36.7 | 43.3 |  |  | 48.3 |
| 43.3 | 56.7 |  |  | 56.7 |
|  | 23.3 |  |  | 26.7 |
|  | 30.0 |  |  | 25.0 |
|  | 55.0 |  |  | 28.3 |

**Figure 5 (agonists)**

| Test 24h post-training | | | | | |
| --- | --- | --- | --- | --- | --- |
| saline | ago A1 | ago A2A | ago A2B | ago A3 | ago A1 + A3 |
| 50.0 | 41.7 | 46.7 | 43.3 | 50.0 | 46.7 |
| 25.0 | 58.3 | 43.3 | 41.7 | 43.3 | 45.0 |
| 36.7 | 55.0 | 43.3 | 55.0 | 51.7 | 51.7 |
| 40.0 | 56.7 | 43.3 | 43.3 | 53.3 | 38.3 |
| 41.7 | 46.7 | 55.0 | 46.7 | 61.7 | 36.7 |
| 38.3 | 43.3 | 51.7 | 60.0 | 56.7 | 41.7 |
| 45.0 | 75.0 | 51.7 |  | 51.7 | 45.0 |
| 55.0 | 48.3 | 41.7 |  | 65.0 | 46.7 |
| 46.7 |  |  |  |  |  |
| 56.7 |  |  |  |  |  |
| 41.7 |  |  |  |  |  |
| 75.0 |  |  |  |  |  |

| Test 24h post-first-test | | | | | |
| --- | --- | --- | --- | --- | --- |
| saline | ago A1 | ago A2A | ago A2B | ago A3 | ago A1 + A3 |
| 66.7 | 31.7 | 43.3 | 45.0 | 35.0 | 26.7 |
| 41.7 | 41.7 | 33.3 | 40.0 | 41.7 | 23.3 |
| 28.3 | 35.0 | 36.7 | 33.3 | 30.0 | 30.0 |
| 28.3 | 61.7 | 41.7 | 25.0 | 31.7 | 31.7 |
| 43.3 | 50.0 | 31.7 | 40.0 | 48.3 | 23.3 |
| 33.3 | 16.7 | 36.7 | 51.7 | 51.7 | 28.3 |
| 51.7 | 35.0 | 45.0 |  | 35.0 | 21.7 |
| 33.3 | 40.0 | 46.7 |  | 40.0 | 18.0 |
| 28.3 |  |  |  |  |  |
| 25.0 |  |  |  |  |  |
| 35.0 |  |  |  |  |  |
| 48.3 |  |  |  |  |  |

| Test 5d post-first-test | | | | | |
| --- | --- | --- | --- | --- | --- |
| saline | ago A1 | ago A2A | ago A2B | ago A3 | ago A1 + A3 |
| 43.3 | 36.7 | 48.3 | 26.7 | 18.3 | 28.3 |
| 25.0 | 46.7 | 38.3 | 40.0 | 13.3 | 35.0 |
| 45.0 | 25.0 | 36.7 | 30.0 | 20.0 | 31.7 |
| 33.3 | 36.7 | 28.3 | 50.0 | 20.0 | 23.3 |
| 73.3 | 60.0 | 25.0 | 21.7 | 33.3 | 26.7 |
| 30.0 | 21.7 | 36.7 | 46.7 | 23.3 | 26.7 |
| 23.3 | 45.0 | 35.0 |  | 30.0 | 23.3 |
| 55.0 | 36.7 | 63.3 |  | 36.7 | 15.0 |
| 36.7 |  |  |  |  |  |
| 51.7 |  |  |  |  |  |
| 36.7 |  |  |  |  |  |
| 43.3 |  |  |  |  |  |

**Figure 6A (adenosine and agonists, late reconsolidation)**

| Test 24h post-training | | | | |
| --- | --- | --- | --- | --- |
| saline | A 10 nmol | ago A1 | ago A3 | ago A1 + A3 |
| 58.3 | 51.7 | 53.3 | 76.7 | 43.3 |
| 35.0 | 46.7 | 70.0 | 53.3 | 40.0 |
| 46.7 | 48.3 | 43.3 | 53.3 | 51.7 |
| 48.3 | 48.3 | 68.3 | 70.0 | 48.3 |
| 56.7 | 71.7 | 50.0 | 58.3 | 38.3 |
| 46.7 | 45.0 | 45.0 | 48.3 | 45.0 |
| 41.7 | 73.3 | 70.0 | 48.3 | 41.7 |
|  |  | 46.7 | 65.0 |  |
|  |  |  | 48.3 |  |
|  |  |  | 45.0 |  |

| Test 24h post-first-test | | | | |
| --- | --- | --- | --- | --- |
| saline | A 10 nmol | ago A1 | ago A3 | ago A1 + A3 |
| 36.7 | 28.3 | 36.7 | 30.0 | 26.7 |
| 45.0 | 28.3 | 36.7 | 35.0 | 28.3 |
| 40.0 | 35.0 | 25.0 | 16.7 | 25.0 |
| 43.3 | 33.3 | 40.0 | 30.0 | 33.3 |
| 60.0 | 30.0 | 25.0 | 38.3 | 30.0 |
| 55.0 | 33.3 | 23.3 | 31.7 | 30.0 |
| 51.3 | 33.3 | 66.7 | 33.3 | 28.3 |
|  |  | 50.0 | 30.0 |  |
|  |  |  | 21.7 |  |
|  |  |  | 30.0 |  |

| Test 5d post-first-test | | | | |
| --- | --- | --- | --- | --- |
| saline | A 10 nmol | ago A1 | ago A3 | ago A1 + A3 |
| 36.7 | 38.3 | 41.7 | 20.0 | 40.0 |
| 36.7 | 33.3 | 16.7 | 41.7 | 38.3 |
| 50.0 | 41.7 | 25.0 | 25.0 | 43.3 |
| 35.0 | 35.0 | 35.0 | 40.0 | 36.7 |
| 45.0 | 46.7 | 31.7 | 43.3 | 43.3 |
| 48.3 | 36.7 | 38.3 | 33.3 | 38.3 |
| 44.7 | 66.7 | 45.0 | 38.3 | 40.0 |
|  |  | 46.7 | 33.3 |  |
|  |  |  | 50.0 |  |
|  |  |  | 45.0 |  |

**Figure 6B (adenosine + antagonists, late reconsolidation)**

| Test 24h post-training | | | |
| --- | --- | --- | --- |
| saline | A 10 nmol | A + antag A1 | A + antag A3 |
| 58.3 | 51.7 | 45.0 | 48.3 |
| 35.0 | 46.7 | 66.7 | 66.7 |
| 46.7 | 48.3 | 50.0 | 65.0 |
| 48.3 | 48.3 | 51.7 | 66.7 |
| 56.7 | 71.7 | 50.0 | 53.3 |
| 46.7 | 45.0 | 51.7 | 55.0 |
| 41.7 | 73.3 | 68.3 | 56.7 |
|  |  | 60.0 | 68.3 |
|  |  | 68.3 | 48.3 |
|  |  | 66.7 | 61.7 |
|  |  | 45.0 |  |
|  |  | 80.0 |  |
|  |  | 50.0 |  |
|  |  | 50.0 |  |
|  |  | 78.3 |  |
|  |  | 48.3 |  |
|  |  | 36.7 |  |
|  |  | 36.7 |  |

| Test 24h post-first-test | | | |
| --- | --- | --- | --- |
| saline | A 10 nmol | A + antag A1 | A + antag A3 |
| 36.7 | 28.3 | 30.0 | 63.3 |
| 45.0 | 28.3 | 48.3 | 35.0 |
| 40.0 | 35.0 | 31.7 | 45.0 |
| 43.3 | 33.3 | 41.7 | 33.3 |
| 60.0 | 30.0 | 50.0 | 21.7 |
| 55.0 | 33.3 | 38.3 | 51.7 |
| 51.3 | 33.3 | 73.3 | 60.0 |
|  |  | 48.3 | 38.3 |
|  |  | 30.0 | 53.3 |
|  |  | 50.0 | 50.0 |
|  |  | 41.7 |  |
|  |  | 25.0 |  |
|  |  | 41.7 |  |
|  |  | 26.7 |  |
|  |  | 31.7 |  |
|  |  | 33.3 |  |
|  |  | 36.7 |  |
|  |  | 31.7 |  |

| Test 5d post-first-test | | | |
| --- | --- | --- | --- |
| saline | A 10 nmol | A + antag A1 | A + antag A3 |
| 36.7 | 38.3 | 26.7 | 58.3 |
| 36.7 | 33.3 | 26.7 | 33.3 |
| 50.0 | 41.7 | 25.0 | 40.0 |
| 35.0 | 35.0 | 30.0 | 40.0 |
| 45.0 | 46.7 | 50.0 | 33.3 |
| 48.3 | 36.7 | 45.0 | 40.0 |
| 44.7 | 66.7 | 51.7 | 38.3 |
|  |  | 25.0 | 60.0 |
|  |  | 26.7 | 53.3 |
|  |  | 31.7 | 38.3 |
|  |  | 36.7 |  |
|  |  | 38.3 |  |
|  |  | 56.7 |  |
|  |  | 55.0 |  |
|  |  | 58.3 |  |
|  |  | 33.3 |  |
|  |  | 35.0 |  |
|  |  | 50.0 |  |

**Figure 7 (adenosine + lactacystin)**

| Test 24h post-training | | | |
| --- | --- | --- | --- |
| saline | A 10 nmol | Lactacistine | A + Lac |
| 58.3 | 51.7 | 63.3 | 70.0 |
| 50.0 | 38.3 | 80.0 | 26.7 |
| 25.0 | 50.0 | 33.3 | 40.0 |
| 36.7 | 41.7 | 66.7 | 33.3 |
| 40.0 | 38.3 | 70.0 | 60.0 |
| 41.7 | 40.0 | 51.7 | 43.3 |
| 38.3 | 31.7 | 38.3 | 78.3 |
| 45.0 | 33.3 |  | 35.0 |
| 55.0 | 48.3 |  | 35.0 |
| 46.7 | 60.0 |  | 73.3 |
| 56.7 | 43.3 |  |  |
| 41.7 | 40.0 |  |  |
| 75.0 | 51.7 |  |  |
|  | 51.7 |  |  |

| Test 24h post-first-test | | | |
| --- | --- | --- | --- |
| saline | A 10 nmol | Lactacistine | A + Lac |
| 36.7 | 28.3 | 65.0 | 58.3 |
| 66.7 | 13.3 | 33.3 | 33.3 |
| 41.7 | 20.0 | 46.7 | 53.3 |
| 28.3 | 16.7 | 40.0 | 43.3 |
| 28.3 | 40.0 | 41.7 | 33.3 |
| 43.3 | 13.3 | 40.0 | 36.7 |
| 33.3 | 16.7 | 38.3 | 61.7 |
| 51.7 | 21.7 |  | 33.3 |
| 33.3 | 1.7 |  | 35.0 |
| 28.3 | 35.0 |  | 43.3 |
| 25.0 | 15.0 |  |  |
| 35.0 | 38.3 |  |  |
| 48.3 | 66.7 |  |  |
|  | 20.0 |  |  |

| Test 5d post-first-test | | | |
| --- | --- | --- | --- |
| saline | A 10 nmol | Lactacistine | A + Lac |
| 36.7 | 38.3 | 53.3 | 46.7 |
| 43.3 | 28.3 | 50.0 | 43.3 |
| 25.0 | 41.7 | 50.0 | 41.7 |
| 45.0 | 30.0 | 36.7 | 60.0 |
| 33.3 | 18.3 | 48.3 | 33.3 |
| 73.3 | 18.3 | 40.0 | 45.0 |
| 30.0 | 15.0 | 50.0 | 41.7 |
| 23.3 | 21.7 |  | 25.0 |
| 55.0 | 21.7 |  | 31.7 |
| 36.7 | 40.0 |  | 33.3 |
| 51.7 | 26.7 |  |  |
| 36.7 | 40.0 |  |  |
| 43.3 | 21.7 |  |  |
|  | 23.3 |  |  |

**Figure 8 (antagonist A3 + rapamycin)**

| Test 24h post-training | | | |
| --- | --- | --- | --- |
| saline | antag A3 | rapa | rapa + antag A3 |
| 58.3 | 43.3 | 41.7 | 60.0 |
| 50.0 | 50.0 | 43.3 | 31.7 |
| 25.0 | 43.3 | 40.0 | 33.3 |
| 36.7 | 73.3 | 35.0 | 70.0 |
| 40.0 | 66.7 | 36.7 | 33.3 |
| 41.7 | 63.3 | 45.0 | 56.7 |
| 38.3 | 45.0 | 56.7 | 40.0 |
| 45.0 | 51.7 | 66.7 | 53.3 |
| 55.0 | 46.7 | 56.7 | 81.7 |
| 46.7 | 48.3 | 41.7 | 38.3 |
| 56.7 | 43.3 | 38.3 | 30.0 |
| 41.7 | 41.7 |  | 48.3 |
| 75.0 |  |  | 65.0 |
|  |  |  | 50.0 |
|  |  |  | 43.3 |
|  |  |  | 73.3 |
|  |  |  | 51.7 |
|  |  |  | 60.0 |

| Test 24h post-first-test | | | |
| --- | --- | --- | --- |
| saline | antag A3 | rapa | rapa + antag A3 |
| 36.7 | 50.0 | 28.3 | 60.0 |
| 66.7 | 36.7 | 30.0 | 30.0 |
| 41.7 | 26.7 | 16.7 | 30.0 |
| 28.3 | 50.0 | 15.0 | 63.3 |
| 28.3 | 25.0 | 30.0 | 25.0 |
| 43.3 | 50.0 | 33.3 | 76.7 |
| 33.3 | 50.0 | 35.0 | 38.3 |
| 51.7 | 50.0 | 21.7 | 40.0 |
| 33.3 | 36.7 | 23.3 | 78.3 |
| 28.3 | 31.7 | 23.3 | 25.0 |
| 25.0 | 60.0 | 16.7 | 45.0 |
| 35.0 | 25.0 |  | 31.7 |
| 48.3 |  |  | 53.3 |
|  |  |  | 51.7 |
|  |  |  | 43.3 |
|  |  |  | 76.7 |
|  |  |  | 53.3 |
|  |  |  | 66.7 |

| Test 5d post-first-test | | | |
| --- | --- | --- | --- |
| saline | antag A3 | rapa | rapa + antag A3 |
| 36.7 | 41.7 | 33.3 | 38.3 |
| 43.3 | 75.0 | 26.7 | 65.0 |
| 25.0 | 81.7 | 26.7 | 23.3 |
| 45.0 | 66.7 | 16.7 | 73.3 |
| 33.3 | 41.7 | 21.7 | 23.3 |
| 73.3 | 55.0 | 16.7 | 78.3 |
| 30.0 | 48.3 | 21.7 | 41.7 |
| 23.3 | 41.7 | 38.3 | 48.3 |
| 55.0 | 31.7 | 18.3 | 61.7 |
| 36.7 | 48.3 | 26.7 | 38.3 |
| 51.7 | 56.7 | 21.7 | 28.3 |
| 36.7 | 26.7 |  | 58.3 |
| 43.3 |  |  | 75.0 |
|  |  |  | 43.3 |
|  |  |  | 36.7 |
|  |  |  | 60.0 |
|  |  |  | 35.0 |
|  |  |  | 53.3 |
