# Supplementary material
Source: HighWire-hosted journal article supplement (https://learnmem.cshlp.org/content/suppl/2023/10/04/30.10.260)
Supplement: Supplemental_Dataset_2.docx [file Supplemental_Dataset_2.docx]

**Dataset2 (number of crossings on platform local)**

**Figure S1 (adenosine dose curve)**

| Test 24h post-training | | | | |
| --- | --- | --- | --- | --- |
| Saline | A 0.1 nmol | A 1 nmol | A 10 nmol | A 100 nmol |
| 5 | 3 | 3 | 3 | 3 |
| 2 | 3 | 3 | 3 | 3 |
| 3 | 4 | 3 | 3 | 3 |
| 4 | 4 | 4 | 3 | 4 |
| 3 | 3 | 3 | 3 | 3 |
| 3 | 3 | 3 | 3 | 3 |
| 5 | 5 | 3 | 3 | 3 |
| 5 |  | 3 | 3 | 5 |
| 4 |  | 5 | 6 | 3 |
| 8 |  | 5 | 4 | 3 |
| 4 |  |  | 3 | 4 |
| 4 |  |  | 3 | 4 |

| Test 24h post-first-test | | | | |
| --- | --- | --- | --- | --- |
| Saline | A 0.1 nmol | A 1 nmol | A 10 nmol | A 100 nmol |
| 3 | 3 | 3 | 2 | 4 |
| 3 | 3 | 3 | 1 | 1 |
| 3 | 3 | 3 | 2 | 1 |
| 3 | 2 | 2 | 2 | 2 |
| 2 | 2 | 5 | 1 | 1 |
| 4 | 4 | 3 | 2 | 1 |
| 3 | 4 | 3 | 2 | 1 |
| 5 |  | 3 | 0 | 3 |
| 3 |  | 3 | 3 | 2 |
| 4 |  | 2 | 1 | 1 |
| 3 |  |  | 1 | 1 |
| 3 |  |  | 2 | 2 |

| Test 5d post-first-test | | | | |
| --- | --- | --- | --- | --- |
| Saline | A 0.1 nmol | A 1 nmol | A 10 nmol | A 100 nmol |
| 5 | 3 | 2 | 2 | 2 |
| 3 | 4 | 3 | 1 | 1 |
| 2 | 2 | 3 | 1 | 1 |
| 4 | 4 | 3 | 2 | 1 |
| 3 | 3 | 3 | 1 | 3 |
| 3 | 3 | 3 | 1 | 1 |
| 3 | 3 | 3 | 2 | 1 |
| 3 |  | 3 | 1 | 1 |
| 3 |  | 3 | 2 | 3 |
| 4 |  | 3 | 1 | 2 |
| 3 |  |  | 1 | 1 |
| 3 |  |  | 4 | 1 |

**Figure S2A (infusion control)**

| Test 24h post-infusion | | Test 5d post-infusion | |
| --- | --- | --- | --- |
| saline | A 10 nmol | saline | A 10 nmol |
| 2 | 2 | 4 | 2 |
| 2 | 2 | 2 | 6 |
| 2 | 5 | 3 | 2 |
| 2 | 2 | 2 | 5 |
| 4 | 5 | 2 | 3 |
| 3 | 7 | 2 | 2 |
| 5 | 2 | 2 | 2 |
| 3 | 5 | 2 | 3 |
| 4 | 2 | 4 | 2 |
| 2 | 2 | 2 | 2 |
| 3 |  | 3 |  |

**Figure S2B (reinforcement control)**

| Test 24h post-reinforcement | | Test 5d post-reinforcement | |
| --- | --- | --- | --- |
| saline | A 10 nmol | saline | A 10 nmol |
| 3 | 4 | 5 | 2 |
| 2 | 2 | 2 | 2 |
| 2 | 5 | 2 | 1 |
| 2 | 3 | 2 | 7 |
| 2 | 5 | 2 | 5 |
| 4 | 5 | 2 | 1 |
| 3 |  | 2 |  |
| 5 |  | 2 |  |
| 3 |  | 2 |  |
| 4 |  | 4 |  |
| 2 |  | 2 |  |

**Figure S2C (temporal control)**

| Test 24h post-training | | Test 24h post-first-test | | Test 5d post-first-test | |
| --- | --- | --- | --- | --- | --- |
| saline | A 10 nmol | saline | A 10 nmol | saline | A 10 nmol |
| 5 | 4 | 3 | 2 | 5 | 2 |
| 3 | 2 | 2 | 4 | 2 | 3 |
| 4 | 2 | 3 | 2 | 4 | 2 |
| 2 | 4 | 2 | 3 | 2 | 2 |
| 4 | 2 | 3 | 2 | 3 | 2 |
| 3 | 3 | 2 | 5 | 2 | 3 |
|  | 2 |  | 3 |  | 7 |
|  | 2 |  | 2 |  | 2 |

**Figure S2D (structure control)**

| Test 24h post-training | | Test 24h post-first-test | | Test 5d post-first-test | |
| --- | --- | --- | --- | --- | --- |
| saline | A 10 nmol | saline | A 10 nmol | saline | A 10 nmol |
| 3 | 7 | 2 | 5 | 2 | 2 |
| 3 | 8 | 4 | 9 | 2 | 7 |
| 5 | 7 | 3 | 5 | 3 | 5 |
| 5 | 3 | 5 | 3 | 2 | 3 |
| 4 | 2 | 3 | 1 | 3 | 2 |
| 4 | 5 | 2 | 3 | 2 | 2 |
| 4 |  | 3 |  | 3 |  |

**Figure S3 (adenosine + antagonists)**

| Test 24h post-training | | | | | |
| --- | --- | --- | --- | --- | --- |
| Saline | A 10 nmol | A + antag-A1 | A + antag -A2A | A + antag-A2B | A + antag-A3 |
| 5 | 3 | 2 | 4 | 4 | 6 |
| 2 | 3 | 3 | 2 | 3 | 4 |
| 3 | 3 | 5 | 4 | 2 | 4 |
| 4 | 3 | 4 | 4 | 3 | 1 |
| 3 | 3 | 2 | 3 | 2 | 3 |
| 3 | 3 | 1 | 6 | 5 | 3 |
| 5 | 3 | 3 | 3 | 2 | 3 |
| 5 | 3 | 3 | 6 | 3 | 6 |
| 4 | 6 | 5 | 3 | 6 | 2 |
| 8 | 4 | 7 | 7 |  | 2 |
| 4 | 3 | 2 | 7 |  | 3 |
| 4 | 3 | 4 | 2 |  | 1 |
|  |  | 7 | 5 |  | 1 |
|  |  |  |  |  | 8 |
|  |  |  |  |  | 3 |
|  |  |  |  |  | 7 |
|  |  |  |  |  | 7 |
|  |  |  |  |  | 4 |

| Test 24h post-first-test | | | | | |
| --- | --- | --- | --- | --- | --- |
| Saline | A 10 nmol | A + antag-A1 | A + antag -A2A | A + antag-A2B | A + antag-A3 |
| 3 | 2 | 3 | 2 | 1 | 2 |
| 3 | 1 | 3 | 1 | 0 | 2 |
| 3 | 2 | 2 | 2 | 0 | 4 |
| 3 | 2 | 3 | 1 | 0 | 2 |
| 2 | 1 | 3 | 1 | 0 | 3 |
| 4 | 2 | 3 | 2 | 2 | 3 |
| 3 | 2 | 2 | 2 | 1 | 4 |
| 5 | 0 | 3 | 2 | 2 | 3 |
| 3 | 3 | 3 | 2 | 3 | 3 |
| 4 | 1 | 2 | 2 |  | 3 |
| 3 | 1 | 1 | 2 |  | 4 |
| 3 | 2 | 4 | 1 |  | 5 |
|  |  | 2 | 2 |  | 3 |
|  |  |  |  |  | 2 |
|  |  |  |  |  | 1 |
|  |  |  |  |  | 1 |
|  |  |  |  |  | 2 |
|  |  |  |  |  | 2 |

| Test 5d post-first-test | | | | | |
| --- | --- | --- | --- | --- | --- |
| Saline | A 10 nmol | A + antag-A1 | A + antag -A2A | A + antag-A2B | A + antag-A3 |
| 5 | 2 | 2 | 2 | 1 | 2 |
| 3 | 1 | 3 | 1 | 1 | 2 |
| 2 | 1 | 3 | 2 | 2 | 2 |
| 4 | 2 | 2 | 2 | 2 | 2 |
| 3 | 1 | 3 | 1 | 2 | 2 |
| 3 | 1 | 3 | 1 | 1 | 2 |
| 3 | 2 | 3 | 2 | 1 | 2 |
| 3 | 1 | 3 | 1 | 1 | 2 |
| 3 | 2 | 4 | 1 | 2 | 2 |
| 4 | 1 | 3 | 2 |  | 2 |
| 3 | 1 | 3 | 2 |  | 3 |
| 3 | 4 | 1 | 1 |  | 1 |
|  |  | 5 | 2 |  | 2 |
|  |  |  |  |  | 8 |
|  |  |  |  |  | 3 |
|  |  |  |  |  | 3 |
|  |  |  |  |  | 4 |
|  |  |  |  |  | 2 |

**Figure S4 (antagonists)**

| Test 24h post-training | | | | |
| --- | --- | --- | --- | --- |
| saline | antag A1 | antag A2A | antag A2B | antag A3 |
| 5 | 4 | 4 | 8 | 2 |
| 2 | 8 | 4 | 6 | 3 |
| 3 | 2 | 1 | 4 | 4 |
| 4 | 3 | 8 | 7 | 4 |
| 3 | 2 | 4 | 7 | 1 |
| 3 | 5 | 5 | 5 | 3 |
| 5 | 3 | 4 | 5 | 3 |
| 5 | 3 | 2 | 2 | 2 |
| 4 | 5 |  |  | 5 |
| 8 | 4 |  |  | 3 |
| 4 | 3 |  |  | 4 |
| 4 | 5 |  |  | 5 |
|  | 3 |  |  | 4 |
|  | 3 |  |  | 3 |
|  | 2 |  |  | 6 |

| Test 24h post-first-test | | | | |
| --- | --- | --- | --- | --- |
| saline | antag A1 | antag A2A | antag A2B | antag A3 |
| 3 | 2 | 2 | 5 | 1 |
| 3 | 3 | 2 | 3 | 3 |
| 3 | 7 | 2 | 3 | 2 |
| 3 | 3 | 4 | 2 | 3 |
| 2 | 2 | 2 | 2 | 1 |
| 4 | 1 | 2 | 3 | 2 |
| 3 | 2 | 3 | 1 | 2 |
| 5 | 6 | 2 | 3 | 1 |
| 3 | 4 |  |  | 3 |
| 4 | 5 |  |  | 2 |
| 3 | 3 |  |  | 4 |
| 3 | 2 |  |  | 4 |
|  | 2 |  |  | 4 |
|  | 1 |  |  | 2 |
|  | 1 |  |  | 1 |

| Test 5d post-first-test | | | | |
| --- | --- | --- | --- | --- |
| saline | antag A1 | antag A2A | antag A2B | antag A3 |
| 5 | 3 | 4 | 3 | 3 |
| 3 | 2 | 2 | 3 | 2 |
| 2 | 4 | 2 | 4 | 2 |
| 4 | 3 | 2 | 6 | 2 |
| 3 | 2 | 4 | 1 | 2 |
| 3 | 2 | 2 | 2 | 3 |
| 3 | 3 | 2 | 3 | 5 |
| 3 | 4 | 2 | 2 | 2 |
| 3 | 2 |  |  | 2 |
| 4 | 2 |  |  | 3 |
| 3 | 2 |  |  | 3 |
| 3 | 2 |  |  | 3 |
|  | 2 |  |  | 2 |
|  | 2 |  |  | 2 |
|  | 2 |  |  | 2 |

**Figure S5 (agonists)**

| Test 24h post-training | | | | | |
| --- | --- | --- | --- | --- | --- |
| saline | ago A1 | ago A2A | ago A2B | ago A3 | ago A1 + A3 |
| 5 | 1 | 5 | 3 | 4 | 5 |
| 2 | 9 | 3 | 4 | 1 | 5 |
| 3 | 7 | 4 | 2 | 3 | 5 |
| 4 | 6 | 4 | 4 | 5 | 5 |
| 3 | 7 | 3 | 4 | 9 | 5 |
| 3 | 2 | 4 | 3 | 3 | 5 |
| 5 | 5 | 4 |  | 2 | 3 |
| 5 | 4 | 4 |  | 7 | 2 |
| 4 |  |  |  |  |  |
| 8 |  |  |  |  |  |
| 4 |  |  |  |  |  |
| 4 |  |  |  |  |  |

| Test 24h post-first-test | | | | | |
| --- | --- | --- | --- | --- | --- |
| saline | ago A1 | ago A2A | ago A2B | ago A3 | ago A1 + A3 |
| 3 | 2 | 4 | 3 | 2 | 2 |
| 3 | 3 | 3 | 3 | 4 | 1 |
| 3 | 3 | 2 | 3 | 1 | 1 |
| 3 | 3 | 2 | 3 | 2 | 1 |
| 2 | 7 | 3 | 6 | 3 | 2 |
| 4 | 1 | 2 | 6 | 5 | 2 |
| 3 | 3 | 2 |  | 2 | 1 |
| 5 | 1 | 2 |  | 1 | 1 |
| 3 |  |  |  |  |  |
| 4 |  |  |  |  |  |
| 3 |  |  |  |  |  |
| 3 |  |  |  |  |  |

| Test 5d post-first-test | | | | | |
| --- | --- | --- | --- | --- | --- |
| saline | ago A1 | ago A2A | ago A2B | ago A3 | ago A1 + A3 |
| 5 | 6 | 3 | 6 | 1 | 1 |
| 3 | 3 | 3 | 1 | 2 | 2 |
| 2 | 4 | 4 | 1 | 2 | 2 |
| 4 | 1 | 4 | 3 | 3 | 1 |
| 3 | 2 | 3 | 2 | 3 | 1 |
| 3 | 2 | 2 | 3 | 3 | 2 |
| 3 | 4 | 2 |  | 3 | 1 |
| 3 | 3 | 4 |  | 2 | 1 |
| 3 |  |  |  |  |  |
| 4 |  |  |  |  |  |
| 3 |  |  |  |  |  |
| 3 |  |  |  |  |  |

**Figure S6A (adenosine and agonists, late reconsolidation)**

| Test 24h post-training | | | | |
| --- | --- | --- | --- | --- |
| saline | A 10 nmol | ago A1 | ago A3 | ago A1 + A3 |
| 6 | 3 | 2 | 4 | 3 |
| 6 | 3 | 2 | 4 | 2 |
| 4 | 3 | 3 | 4 | 3 |
| 2 | 3 | 3 | 4 | 3 |
| 3 | 3 | 3 | 6 | 5 |
| 3 | 4 | 2 | 4 | 4 |
| 4 | 2 | 7 | 2 | 2 |
|  |  | 2 | 2 |  |
|  |  |  | 4 |  |
|  |  |  | 3 |  |

| Test 24h post-first-test | | | | |
| --- | --- | --- | --- | --- |
| saline | A 10 nmol | ago A1 | ago A3 | ago A1 + A3 |
| 5 | 1 | 1 | 1 | 1 |
| 1 | 1 | 2 | 1 | 1 |
| 3 | 1 | 2 | 1 | 2 |
| 3 | 2 | 3 | 2 | 1 |
| 4 | 1 | 1 | 2 | 2 |
| 2 | 2 | 1 | 2 | 1 |
| 6 | 2 | 7 | 2 | 1 |
|  |  | 3 | 1 |  |
|  |  |  | 2 |  |
|  |  |  | 1 |  |

| Test 5d post-first-test | | | | |
| --- | --- | --- | --- | --- |
| saline | A 10 nmol | ago A1 | ago A3 | ago A1 + A3 |
| 3 | 2 | 1 | 1 | 3 |
| 3 | 2 | 1 | 1 | 3 |
| 3 | 2 | 1 | 1 | 4 |
| 2 | 2 | 2 | 1 | 3 |
| 4 | 2 | 3 | 5 | 2 |
| 1 | 2 | 2 | 4 | 3 |
| 3 | 3 | 3 | 4 | 2 |
|  |  | 3 | 2 |  |
|  |  |  | 2 |  |
|  |  |  | 3 |  |

**Figure S6B (adenosine + antagonists, late reconsolidation)**

| Test 24h post-training | | | |
| --- | --- | --- | --- |
| saline | A 10 nmol | A + antag A1 | A + antag A3 |
| 6 | 3 | 3 | 4 |
| 6 | 3 | 3 | 2 |
| 4 | 3 | 4 | 4 |
| 2 | 3 | 3 | 2 |
| 3 | 3 | 4 | 3 |
| 3 | 4 | 3 | 3 |
| 4 | 2 | 3 | 2 |
|  |  | 3 | 4 |
|  |  | 2 | 3 |
|  |  | 4 | 3 |
|  |  | 3 |  |
|  |  | 4 |  |
|  |  | 3 |  |
|  |  | 3 |  |
|  |  | 2 |  |
|  |  | 3 |  |
|  |  | 4 |  |
|  |  | 2 |  |

| Test 24h post-first-test | | | |
| --- | --- | --- | --- |
| saline | A 10 nmol | A + antag A1 | A + antag A3 |
| 5 | 1 | 2 | 4 |
| 1 | 1 | 3 | 2 |
| 3 | 1 | 2 | 2 |
| 3 | 2 | 2 | 2 |
| 4 | 1 | 4 | 2 |
| 2 | 2 | 2 | 4 |
| 6 | 2 | 3 | 2 |
|  |  | 2 | 2 |
|  |  | 2 | 2 |
|  |  | 2 | 2 |
|  |  | 3 |  |
|  |  | 4 |  |
|  |  | 3 |  |
|  |  | 4 |  |
|  |  | 2 |  |
|  |  | 3 |  |
|  |  | 3 |  |
|  |  | 2 |  |

| Test 5d post-first-test | | | |
| --- | --- | --- | --- |
| saline | A 10 nmol | A + antag A1 | A + antag A3 |
| 3 | 2 | 2 | 3 |
| 3 | 2 | 2 | 2 |
| 3 | 2 | 2 | 3 |
| 2 | 2 | 2 | 1 |
| 4 | 2 | 2 | 1 |
| 2 | 2 | 2 | 2 |
| 3 | 3 | 2 | 3 |
|  |  | 3 | 7 |
|  |  | 3 | 3 |
|  |  | 2 | 1 |
|  |  | 3 |  |
|  |  | 3 |  |
|  |  | 2 |  |
|  |  | 2 |  |
|  |  | 4 |  |
|  |  | 2 |  |
|  |  | 4 |  |
|  |  | 4 |  |

**Figure S7 (adenosine + lactacystin)**

| Test 24h post-training | | | |
| --- | --- | --- | --- |
| saline | A 10 nmol | Lactacistine | A + Lac |
| 5 | 3 | 3 | 3 |
| 2 | 2 | 2 | 2 |
| 3 | 2 | 5 | 4 |
| 2 | 2 | 12 | 2 |
| 4 | 3 | 4 | 2 |
| 2 | 3 | 2 | 2 |
| 4 | 3 | 4 | 3 |
| 3 | 2 | 6 | 3 |
| 3 | 6 | 2 | 2 |
| 5 | 4 | 3 | 4 |
| 5 | 2 |  |  |
| 4 | 9 |  |  |
| 8 | 3 |  |  |
|  | 4 |  |  |

| Test 24h post-first-test | | | |
| --- | --- | --- | --- |
| saline | A 10 nmol | Lactacistine | A + Lac |
| 3 | 2 | 9 | 4 |
| 2 | 1 | 2 | 3 |
| 2 | 2 | 3 | 4 |
| 2 | 2 | 5 | 5 |
| 2 | 1 | 3 | 2 |
| 2 | 2 | 2 | 2 |
| 2 | 2 | 4 | 6 |
| 2 | 1 | 3 | 2 |
| 4 | 2 | 4 | 2 |
| 3 | 1 | 3 | 3 |
| 5 | 1 |  |  |
| 3 | 1 |  |  |
| 4 | 2 |  |  |
|  | 1 |  |  |

| Test 5d post-first-test | | | |
| --- | --- | --- | --- |
| saline | A 10 nmol | Lactacistine | A + Lac |
| 5 | 2 | 3 | 2 |
| 2 | 2 | 2 | 3 |
| 2 | 1 | 3 | 3 |
| 2 | 2 | 6 | 3 |
| 4 | 1 | 3 | 2 |
| 2 | 1 | 3 | 3 |
| 3 | 2 | 2 | 2 |
| 2 | 2 | 2 | 2 |
| 2 | 2 | 2 | 3 |
| 2 | 2 | 4 | 4 |
| 2 | 1 |  |  |
| 2 | 1 |  |  |
| 4 | 2 |  |  |
|  | 1 |  |  |

**Figure S8 (antagonist A3 + rapamycin)**

| Test 24h post-training | | | |
| --- | --- | --- | --- |
| saline | antag A3 | rapa | rapa + antag A3 |
| 5 | 2 | 2 | 10 |
| 2 | 3 | 3 | 2 |
| 3 | 4 | 5 | 3 |
| 2 | 2 | 2 | 9 |
| 4 | 3 | 2 | 2 |
| 2 | 3 | 3 | 4 |
| 4 | 2 | 2 | 5 |
| 3 | 5 | 4 | 2 |
| 3 | 3 | 2 | 12 |
| 5 | 4 | 3 | 3 |
| 5 | 5 | 2 | 3 |
| 4 | 4 |  | 2 |
| 8 |  |  | 5 |
|  |  |  | 3 |
|  |  |  | 5 |
|  |  |  | 3 |
|  |  |  | 5 |
|  |  |  | 5 |

| Test 24h post-first-test | | | |
| --- | --- | --- | --- |
| saline | antag A3 | rapa | rapa + antag A3 |
| 3 | 2 | 2 | 6 |
| 2 | 3 | 1 | 2 |
| 2 | 3 | 1 | 2 |
| 2 | 2 | 1 | 8 |
| 2 | 2 | 2 | 2 |
| 2 | 2 | 1 | 8 |
| 2 | 2 | 1 | 2 |
| 2 | 3 | 1 | 3 |
| 4 | 2 | 2 | 8 |
| 3 | 4 | 1 | 2 |
| 5 | 4 | 1 | 3 |
| 3 | 4 |  | 2 |
| 4 |  |  | 3 |
|  |  |  | 2 |
|  |  |  | 2 |
|  |  |  | 4 |
|  |  |  | 2 |
|  |  |  | 3 |

| Test 5d post-first-test | | | |
| --- | --- | --- | --- |
| saline | antag A3 | rapa | rapa + antag A3 |
| 5 | 3 | 2 | 3 |
| 2 | 2 | 1 | 3 |
| 2 | 2 | 2 | 2 |
| 2 | 2 | 1 | 7 |
| 4 | 3 | 2 | 3 |
| 2 | 5 | 1 | 4 |
| 3 | 2 | 1 | 3 |
| 2 | 2 | 1 | 3 |
| 2 | 3 | 1 | 6 |
| 2 | 3 | 2 | 2 |
| 2 | 3 | 1 | 2 |
| 2 | 2 |  | 2 |
| 4 |  |  | 5 |
|  |  |  | 2 |
|  |  |  | 4 |
|  |  |  | 4 |
|  |  |  | 5 |
|  |  |  | 4 |
