# Supplementary material
Source: HighWire-hosted journal article supplement (https://learnmem.cshlp.org/content/suppl/2023/10/04/30.10.260)
Supplement: Supplementary_Figures.docx [file Supplementary_Figures.docx]

**Supplementary Figures**


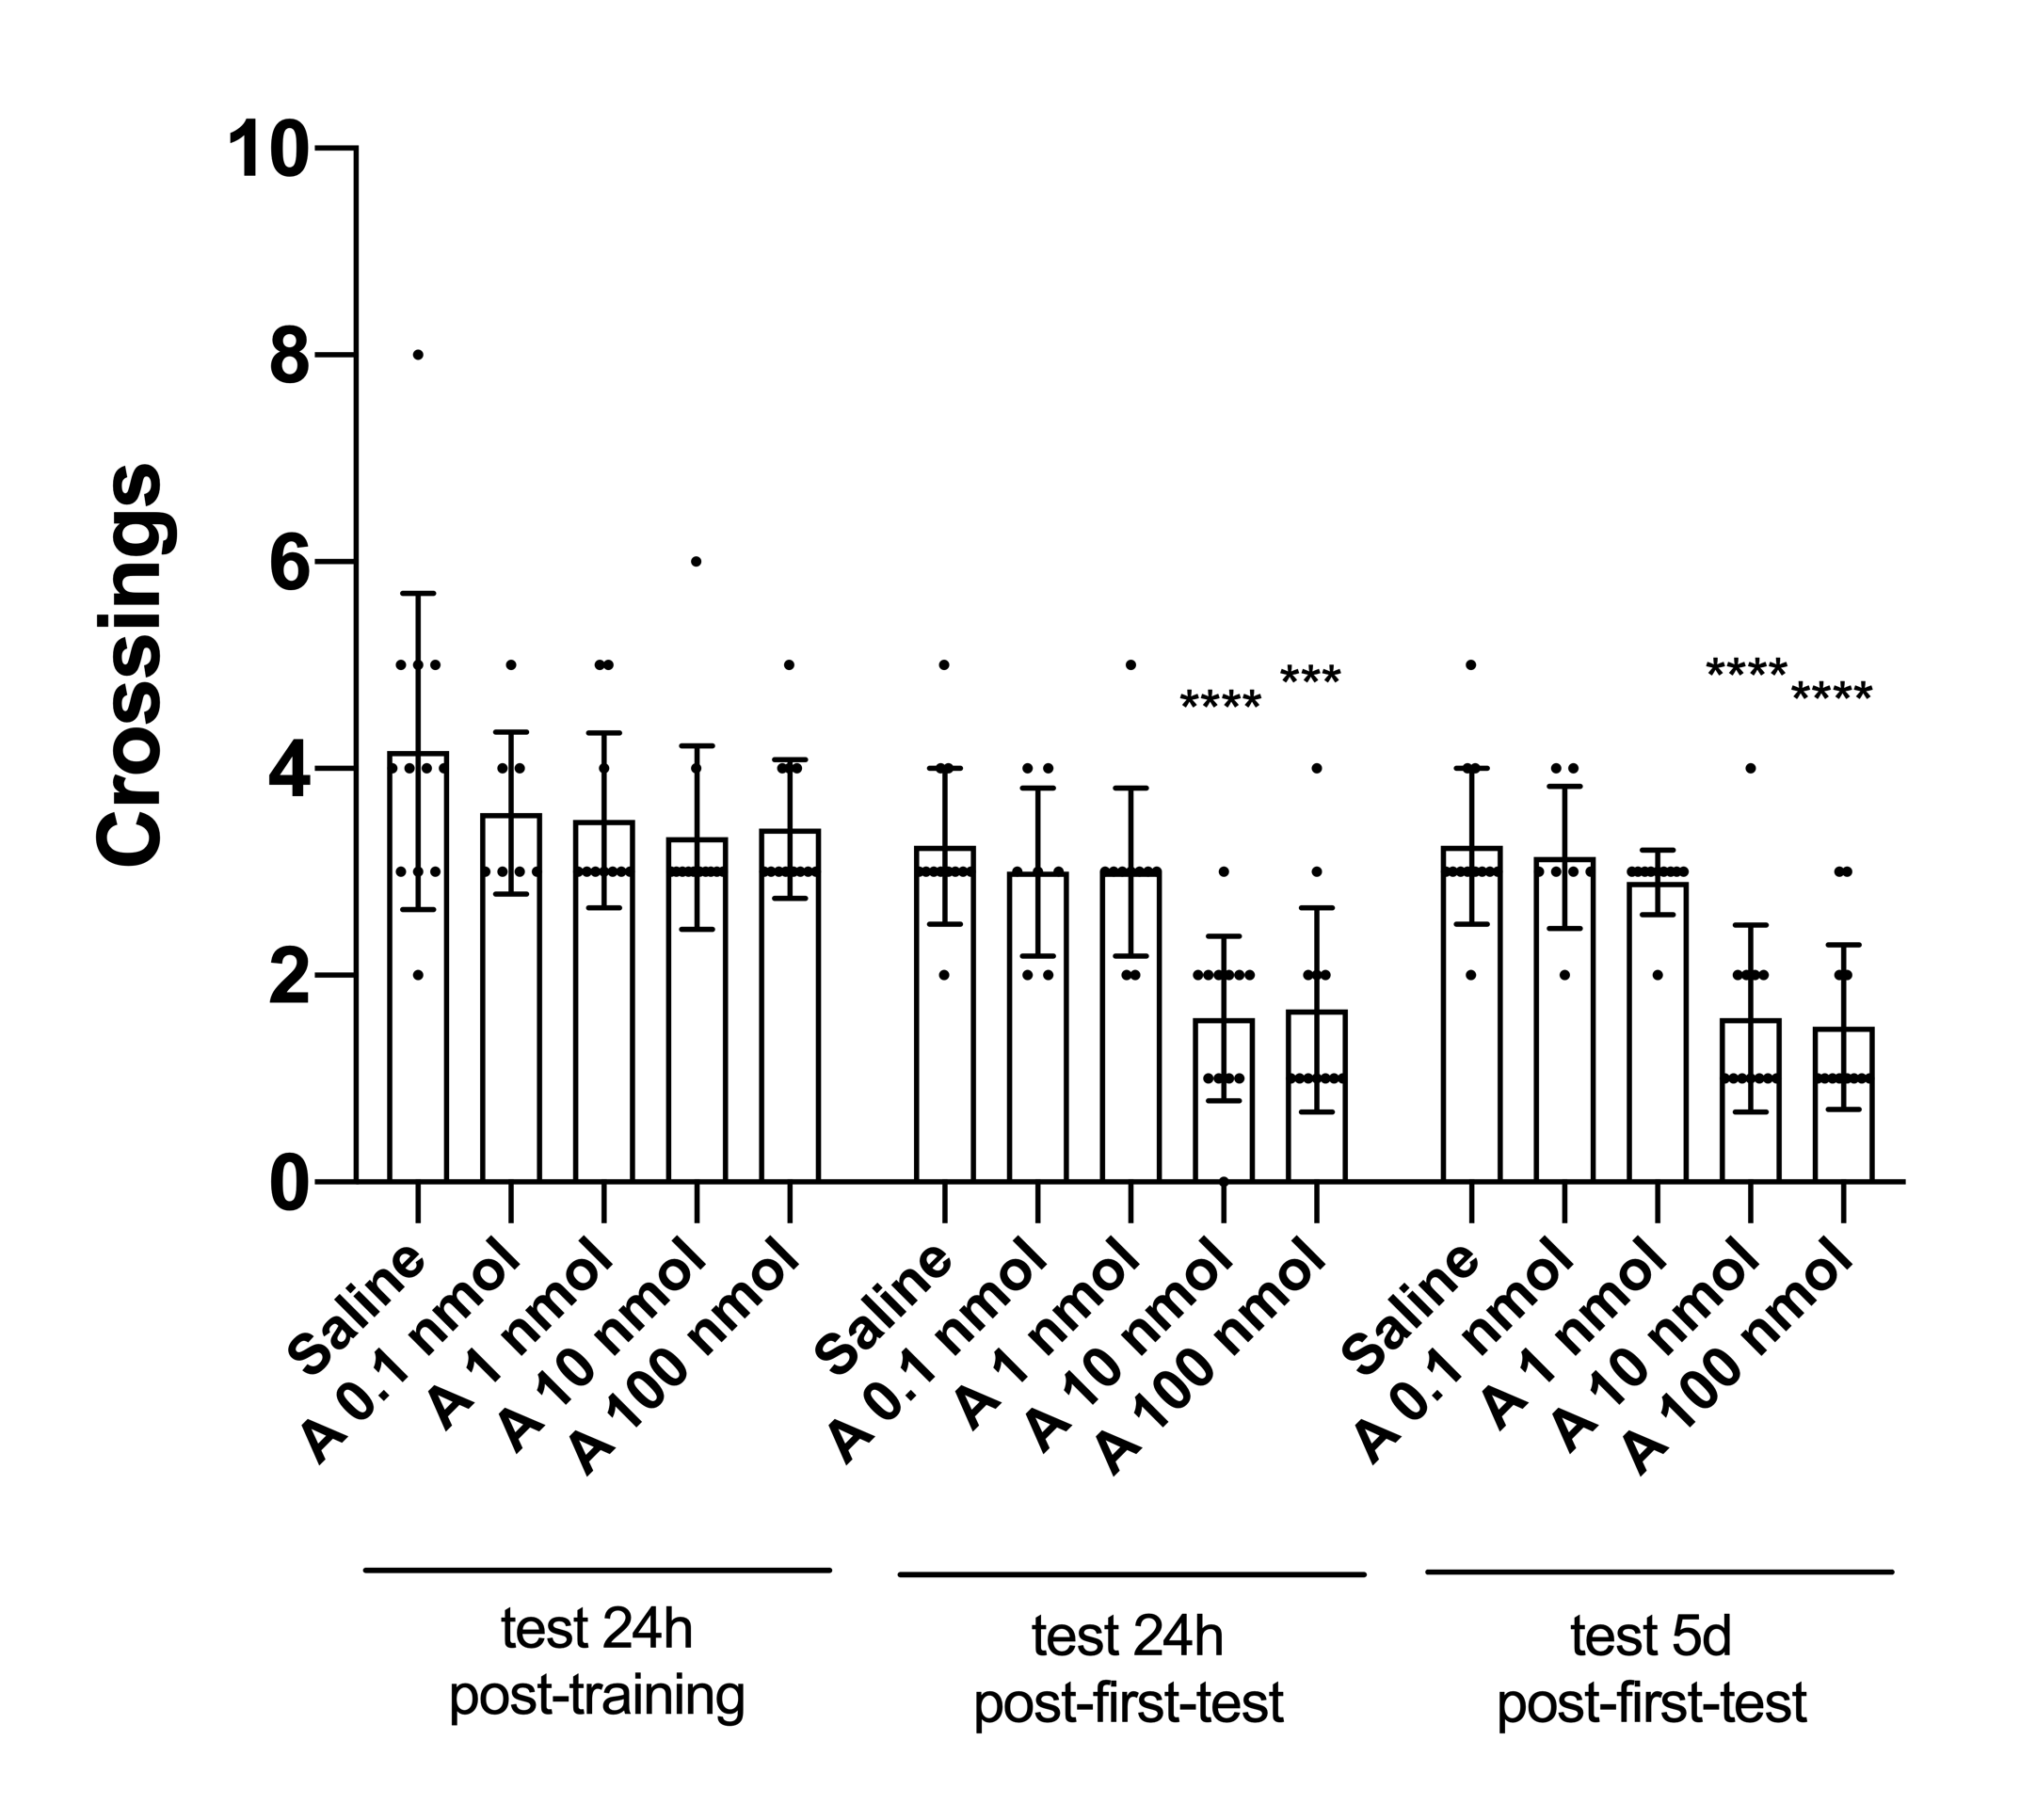


**Figure S1**. Intrahippocampal infusion of adenosine immediately after nonreinforced retrieval hinders recent and late spatial memory retention as measured 24 h and 5 d after infusion. Male Wistar rats with infusion cannulae implanted into the CA1 region of the dorsal hippocampus were trained during 5 d in the spatial version of the MWM. Twenty-four hours after the last training session, the animals were randomly assigned to one out of five experimental groups and submitted to a 60-s probe test in the absence of the escape platform. Immediately after this first test, the animals received intrahippocampal bilateral infusions (black arrow) of either saline solution (Saline) or adenosine (A 0.1, 1, 10 or 100 nmol). Memory retention was assessed in sucessive 60-s probe tests carried out either 24 h or 5 d after the first test. Data are expressed as means (± SD) of the number of crossings on the platform local. Dots: individual value for each rat. ***P < 0.001, ****P < 0.0001 vs. respective Saline group, one-way ANOVA: test 24h post-first-test, F(4, 48) = 10.35;test 5d post-first-test, F(4, 48) = 15.16; Dunnett’s post test; n = 7–12 per group.


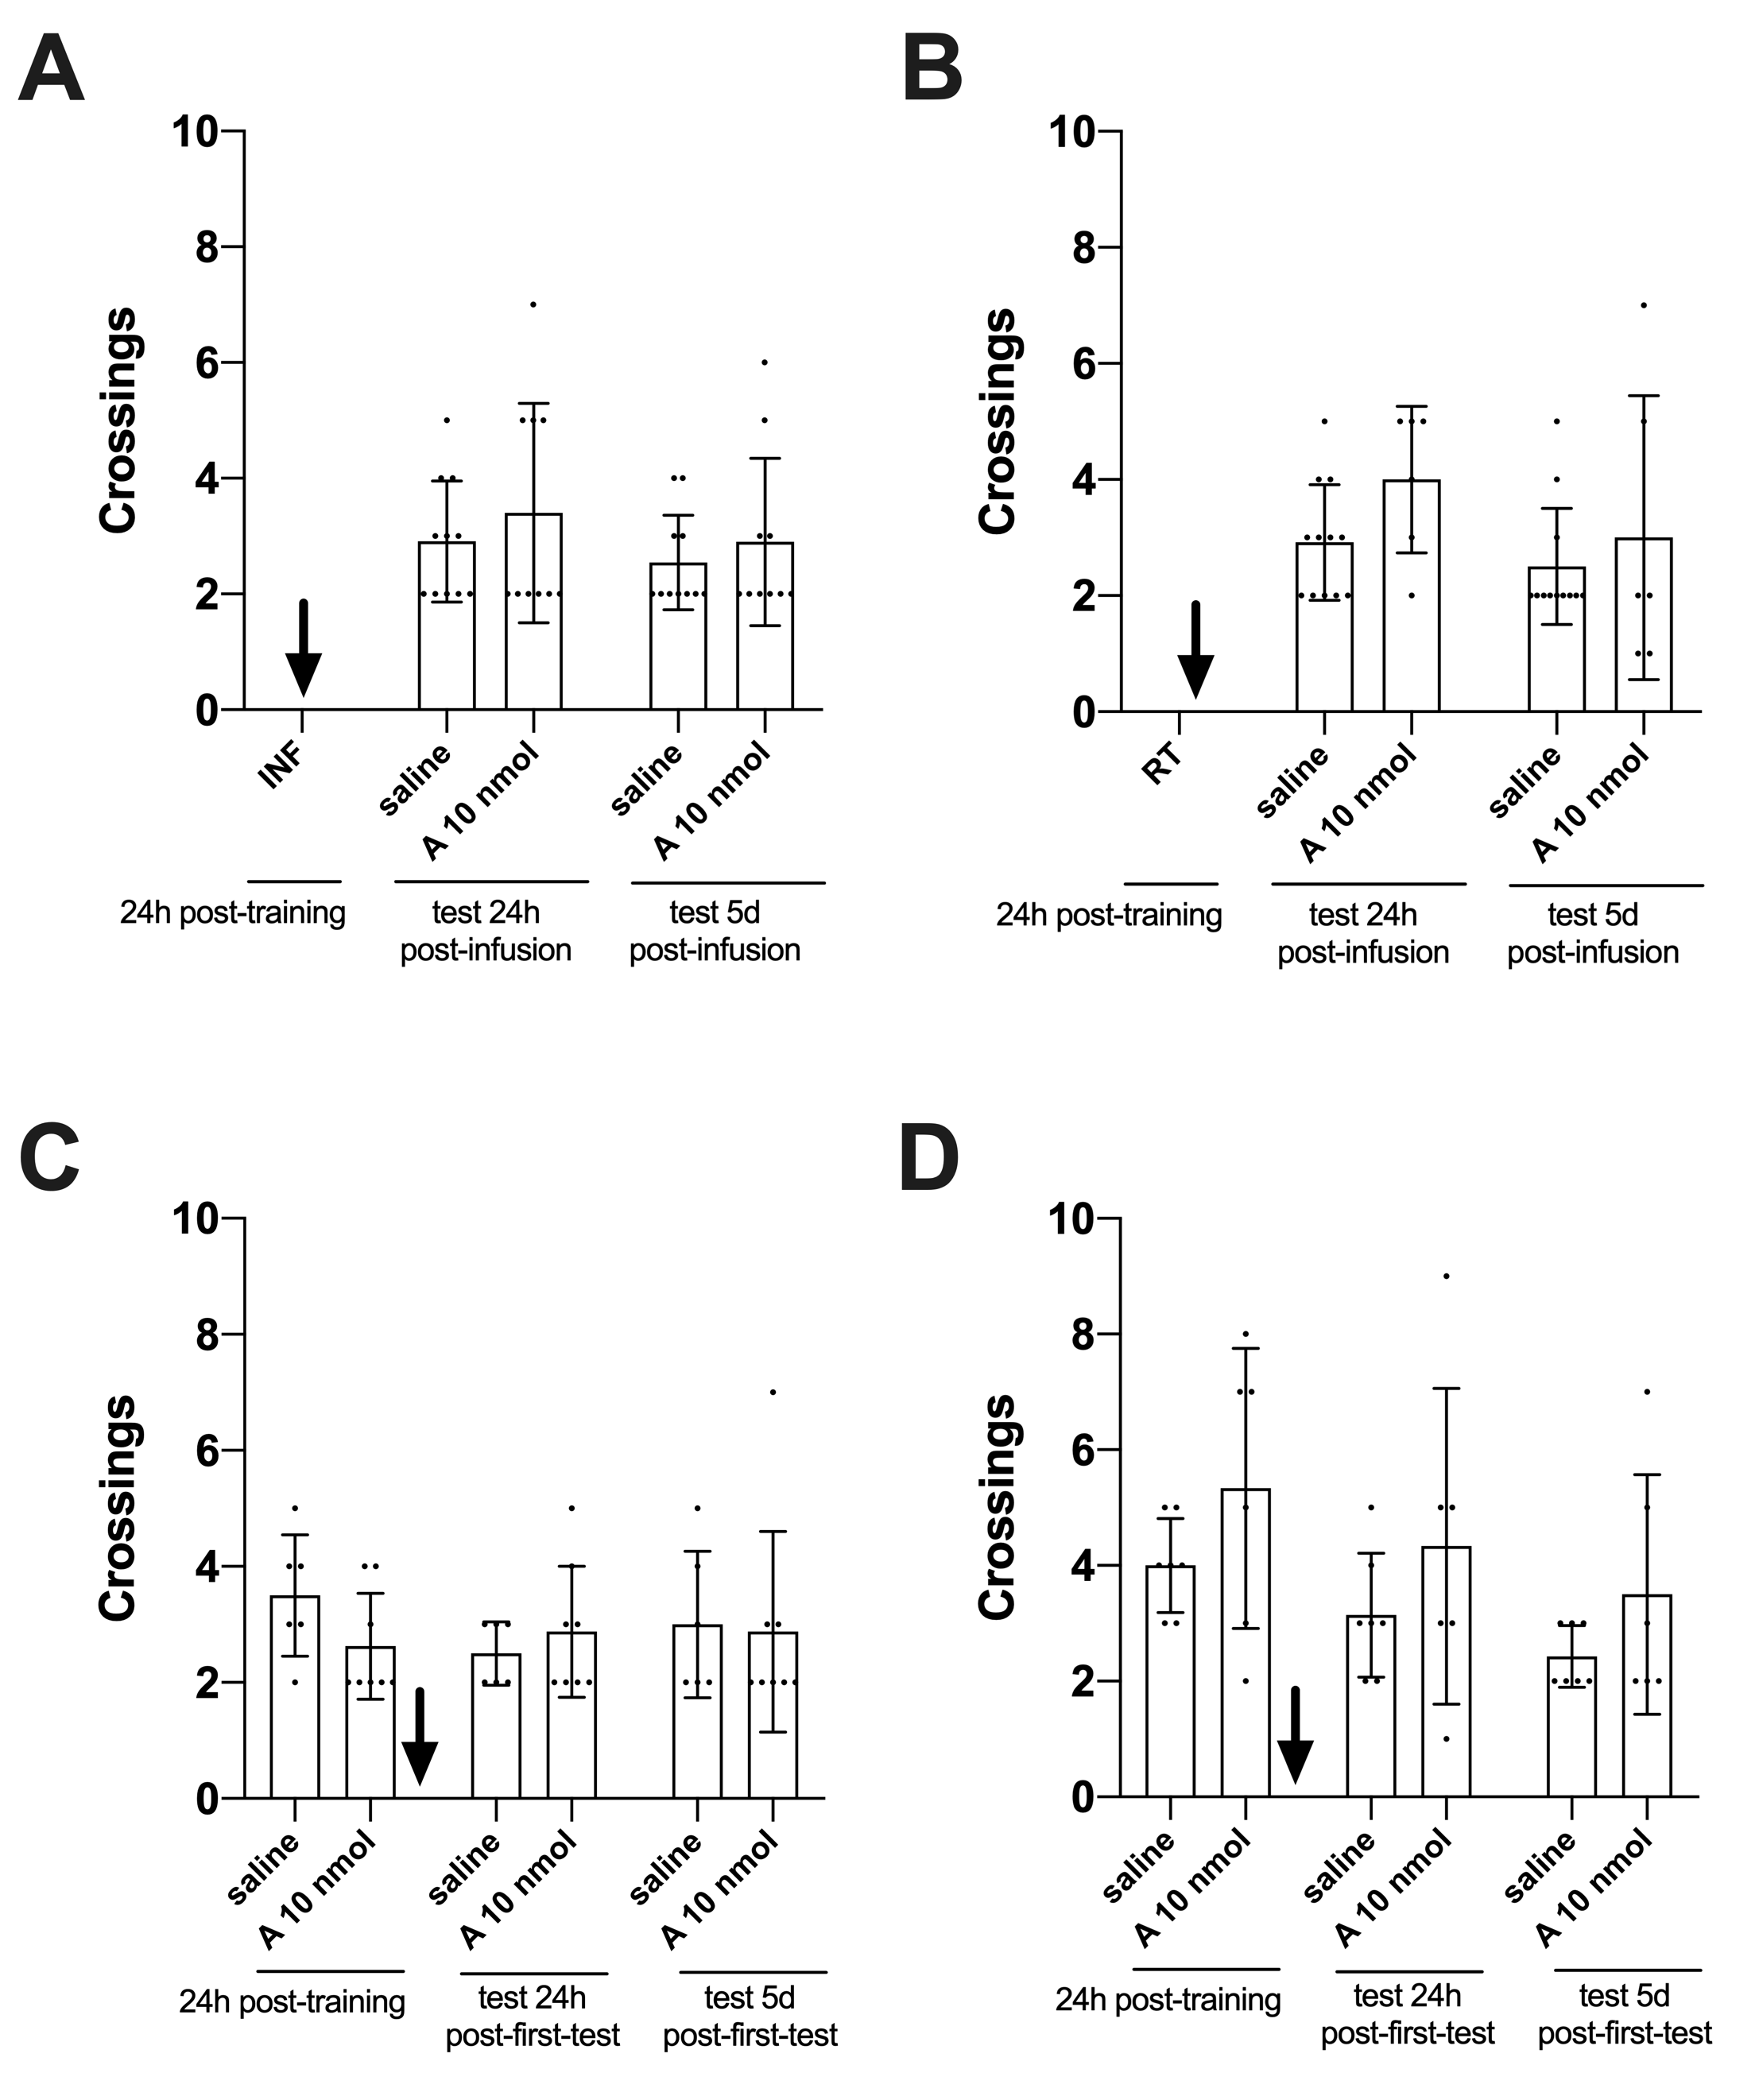


**Figure S2**. **A**. Intrahippocampal infusion of adenosine after the last day of training does not affect early and late spatial memory retention as measured 24 h and 5 days after infusion. Male Wistar rats with infusion cannulae implanted into the CA1 region of the dorsal hippocampus were trained during 5 days in the spatial version of the MWM. Twenty four hours after the last training session, the animals received intrahippocampal bilateral infusions of either saline solution (saline) or adenosine 10 nmol (A 10 nmol). Memory retention was assessed in sucessive 60 s probe tests carried out either 24 h or 5 days after infusion (INF, black arrow). Dots: individual value for each rat. Data are expressed as means (± SD) of the number of crossings on the platform local. There was no difference between saline and adenosine groups, t-Student test: test 24h post-first-test, t(19) = 0.7442; test 5d post-first-test, t(19) = 0.6987; n = 10–11 per group. **B**. Intrahippocampal infusion of adenosine immediately after reinforced retrieval does not affect early and late spatial memory retention as measured 24 h and 5 days after the first test. Male Wistar rats with infusion cannulae implanted into the CA1 region of the dorsal hippocampus were trained during 5 days in the spatial version of the MWM. Twenty-four hours after the last training session, the animals were submitted to a 60 s probe test in the presence of the escape platform (R). Immediately after R, the animals received intrahippocampal bilateral infusions (black arrow) of either saline solution (saline) or adenosine 10 nmol (A 10 nmol). Memory retention was assessed in sucessive 60 s probe tests carried out either 24 h or 5 d after R. Dots: individual value for each rat. Data are expressed as means (± SD) of the number of crossings on the platform local. There was no difference between saline and adenosine groups, t-Student test: test 24h post-first-test, t(16) = 1.993; test 5d post-first-test, t(16) = 0.6247; n = 6–12 per group. **C**. Intra-hippocampal infusion of adenosine 3 h after nonreinforced retrieval does not affect early and late spatial memory retention as measured 24 h and 5 days after the first test. Male Wistar rats with infusion cannulae implanted into the CA1 region of the dorsal hippocampus were trained during 5 days in the spatial version of the MWM. Twenty-four hours after the last training session, the animals were submitted to a 60 s probe test in the absence of the escape platform. Three hours after this test, the animals received intra-hippocampal bilateral infusions (black arrow) of either saline solution (saline) or adenosine 10 nmol (A 10 nmol). Memory retention was assessed in sucessive 60 s probe tests carried out either 24 h or 5 d after the first test. Dots: individual value for each rat. Data are expressed as means (± SD) of the number of crossings on the platform local. There was no difference between saline and adenosine groups, t-Student test: test 24h post-first-test, t(12) = 0.7468; test 5d post-first-test, t(12) = 0.1492; n = 6–8 per group. **D**. Intra-mediolateral occipital cortex infusion of adenosine immediately after nonreinforced retrieval does not affect early and late spatial memory retention as measured 24 h and 5 days after the first test. Male Wistar rats with infusion cannulae implanted into the mediolateral occipital cortex were trained during 5 days in the spatial version of the MWM. Twenty-four hours after the last training session, the animals were submitted to a 60 s probe test in the absence of the escape platform. Immediately after this test, the animals received intra-mediolateral occipital cortex bilateral infusions (black arrow) of either saline solution (saline) or adenosine 10 nmol (A 10 nmol). Memory retention was assessed in sucessive 60 s probe tests carried out either 24 h or 5 d after the first test. Dots: individual value for each rat. Data are expressed as means (± SD) of the number of crossings on the platform local. There was no difference between saline and adenosine groups, t-Student test: test 24h post-first-test, t(11) = 1.068; test 5d post-first-test, t(11) = 1.326; n = 6–7 per group.


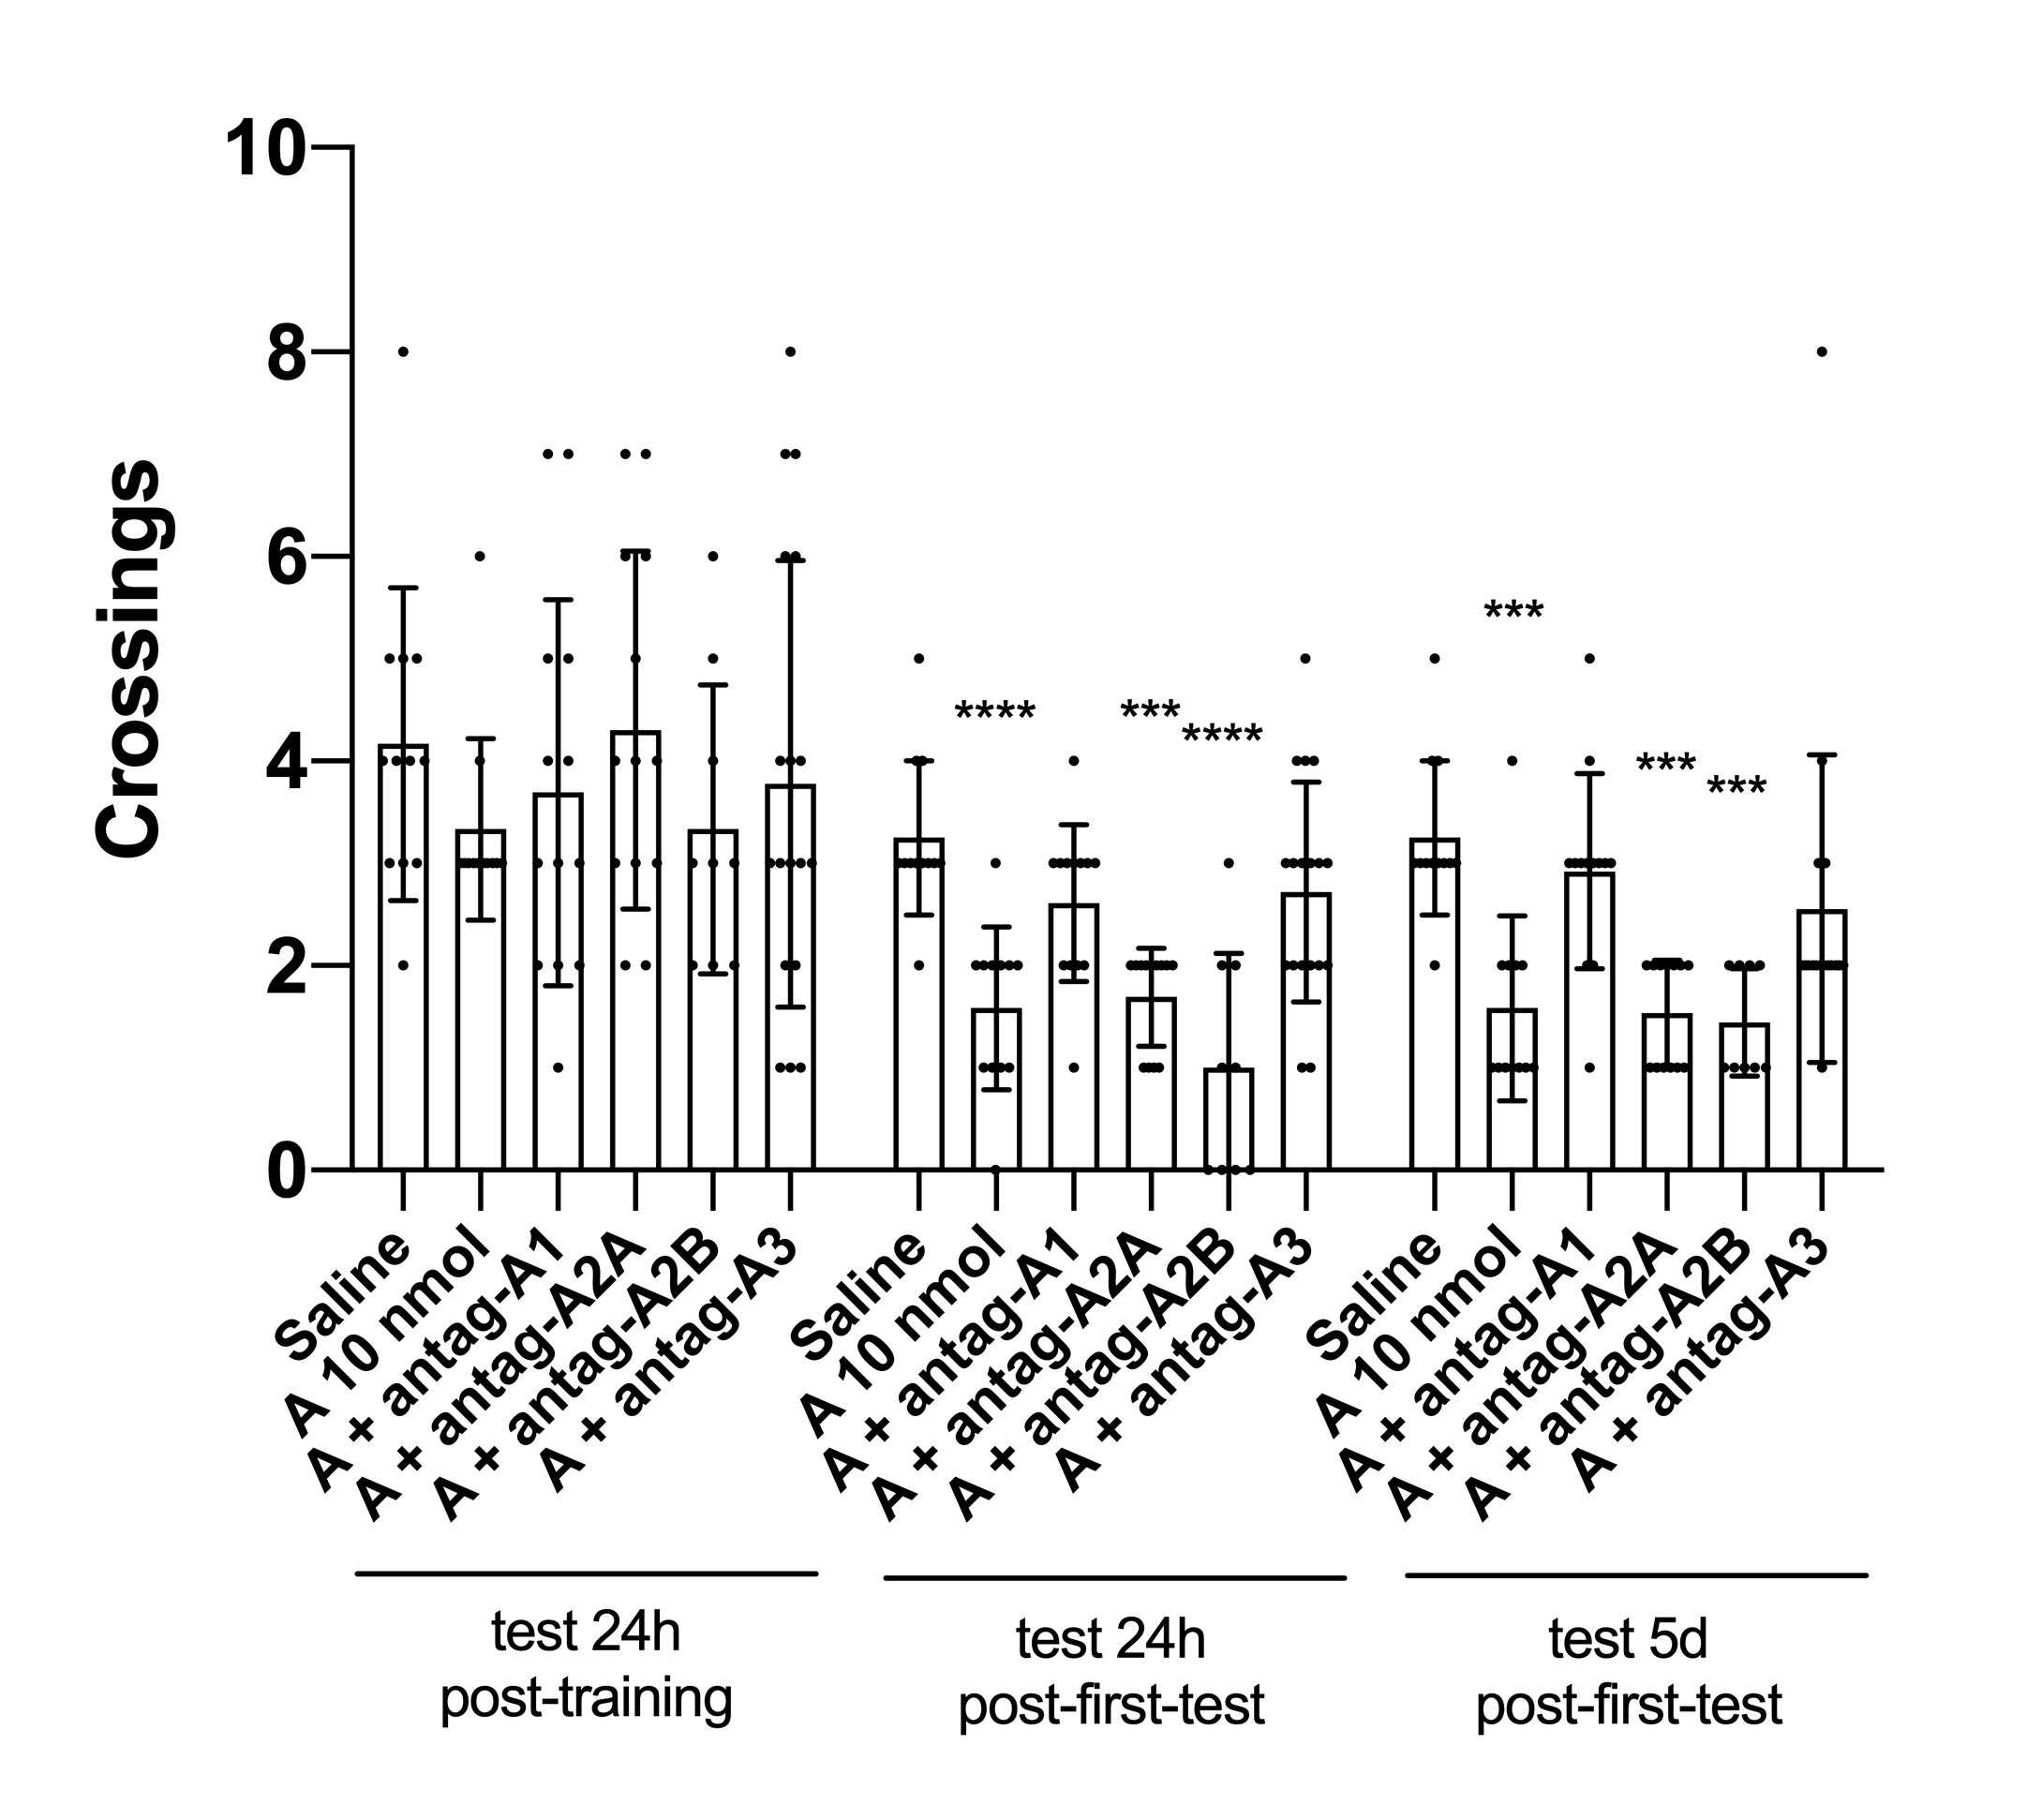


**Figure S3**. The amnesic effect induced by the intra-hippocampal infusion of adenosine is blocked by A1 and A3 but not A2A or A2B receptor antagonists. Male Wistar rats with infusion cannulae implanted into the CA1 region of the dorsal hippocampus were trained during 5 d in the spatial version of the MWM. Twenty-four hours after the last training session, the animals were submitted to a 60-s probe test in the absence of the escape platform. Immediately after this first test, the animals received intrahippocampal bilateral infusions (black arrow) of either saline solution (Saline), adenosine 10 nmol (A 10 nmol) or adenosine 10 nmol plus A1 (A + antag A1), A2A (A + antag A2A), A2B (A + antag A2B) or A3 (A + antag A3) receptor antagonist, 50 nmol each antagonist. Memory retention was assessed in sucessive 60-s probe tests carried out either 24 h or 5 d after the first test. Data are expressed as means (± SD) of the number of crossings on the platform local. Dots: individual value for each rat. ***P < 0.001, ****P < 0.0001 vs. respective Saline group, one-way ANOVA: test 24h post-first-test, F(5, 71) = 11.11;test 5d post-first-test, F(5, 71) = 7.565; Dunnett’s post test; n = 9–18 per group.


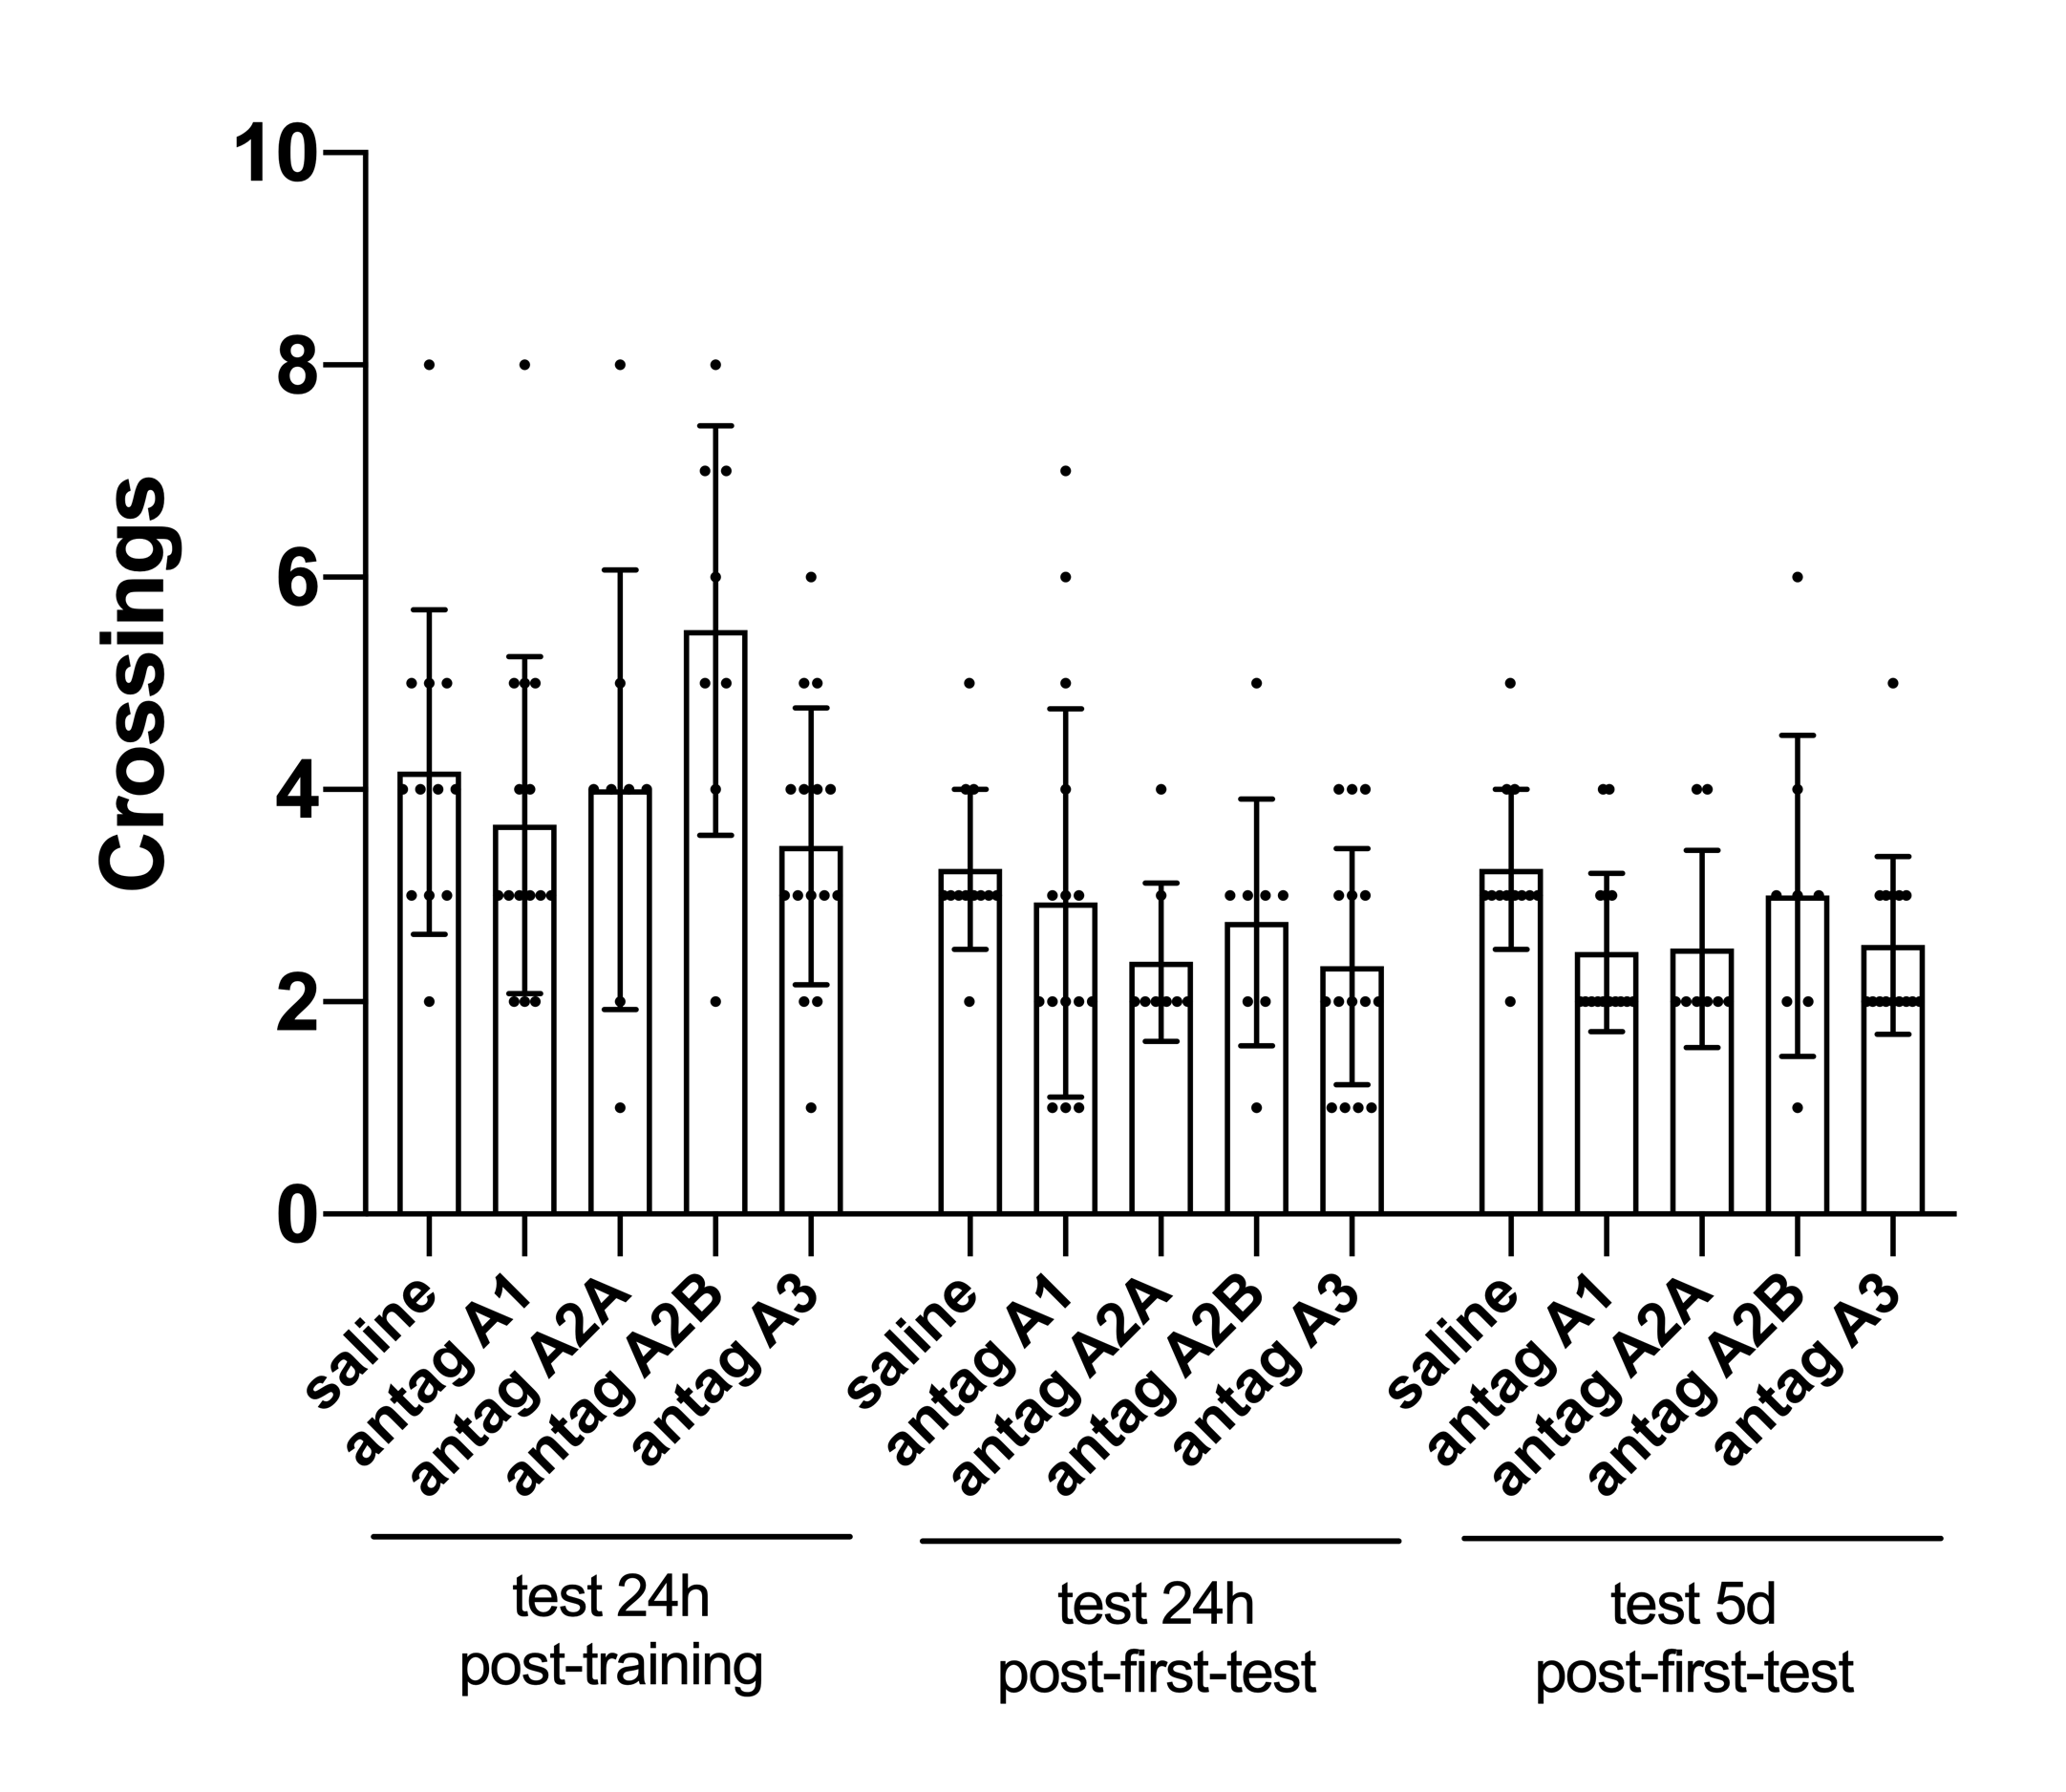


**Figure S4**. Antagonists of A1, A2A, A2B and A3 receptors have no effect on spatial memory reconsolidation. Male Wistar rats with infusion cannulae implanted into the CA1 region of the dorsal hippocampus were trained during 5 d in the spatial version of the MWM. Twenty-four hours after the last training session, the animals were submitted to a 60-s probe test in the absence of the escape platform. Immediately after this first test, the animals received intrahippocampal bilateral infusions (black arrow) of either saline solution (saline) or A1 (antag A1), A2A (antag A2A), A2B (antag A2B) or A3 (antag A3) receptor antagonist, 50 nmol each antagonist. Memory retention was assessed in sucessive 60-s probe tests carried out either 24 h or 5 d after the first test. Data are expressed as means (± SD) of the number of crossings on the platform local. Dots: individual value for each rat. There was no difference respective to saline group regarding distinct drug infusion: one-way ANOVA: test 24h post-first-test, F(4, 53) = 1.142;test 5d post-first-test, F(4, 53) = 1.701; Dunnett’s post test; n = 8–15 per group.


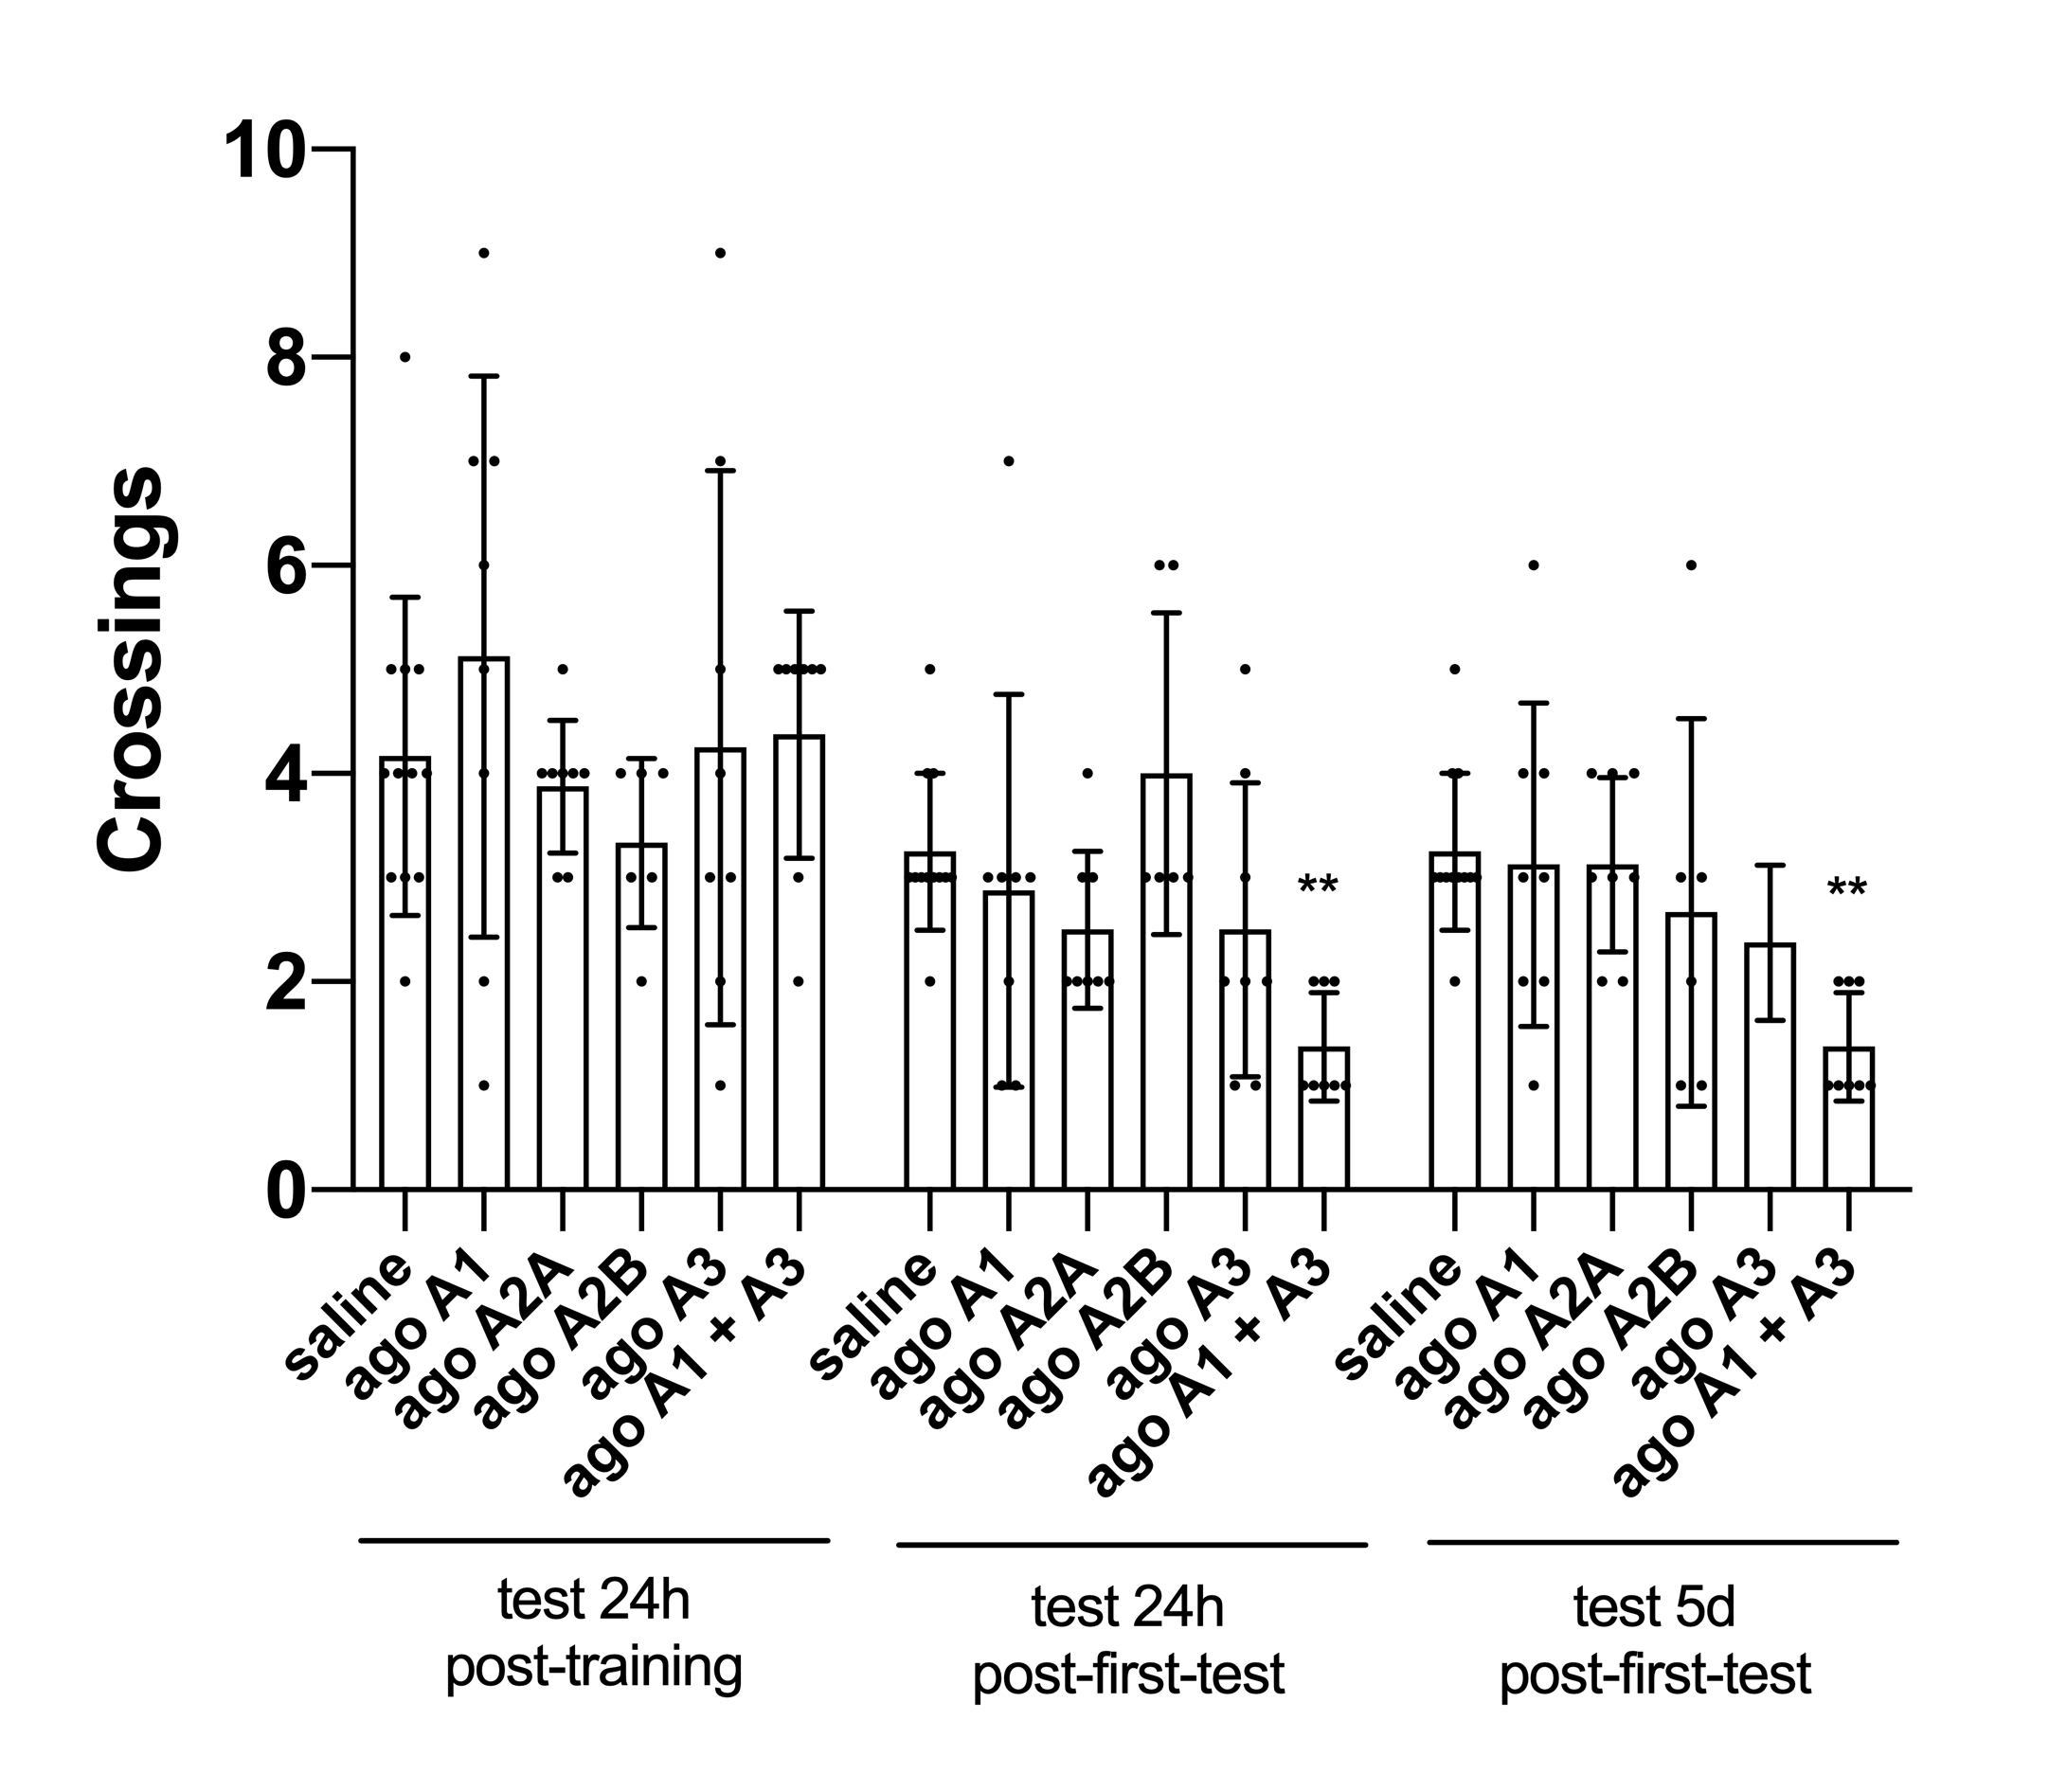


**Figure S5.** The amnesic effect of adenosine is mimicked by A1 and A3 receptor agonists infused together. Male Wistar rats with infusion cannulae implanted into the CA1 region of the dorsal hippocampus were trained during 5 d in the spatial version of the MWM. Twenty-four hours after the last training session, the animals were submitted to a 60-s probe test in the absence of the escape platform. Immediately after this first test, the animals received intrahippocampal bilateral infusions (black arrow) of either saline solution (saline) or A1 (ago A1), A2A (ago A2A), A2B (ago A2B), A3 (ago A3) or A1 plus A3 (ago A1 + A3) receptor agonist, 10 nmol each agonist. Memory retention was assessed in sucessive 60-s probe tests carried out either 24 h or 5 d after the first test. Data are expressed as means (± SD) of the number of crossings on the platform local. Dots: individual value for each rat. **P < 0.01 vs. respective Saline group, one-way ANOVA: test 24h post-first-test, F(5, 44) = 3.998;test 5d post-first-test, F(5, 44) = 3.689; Dunnett’s post test; n = 6–12 per group.


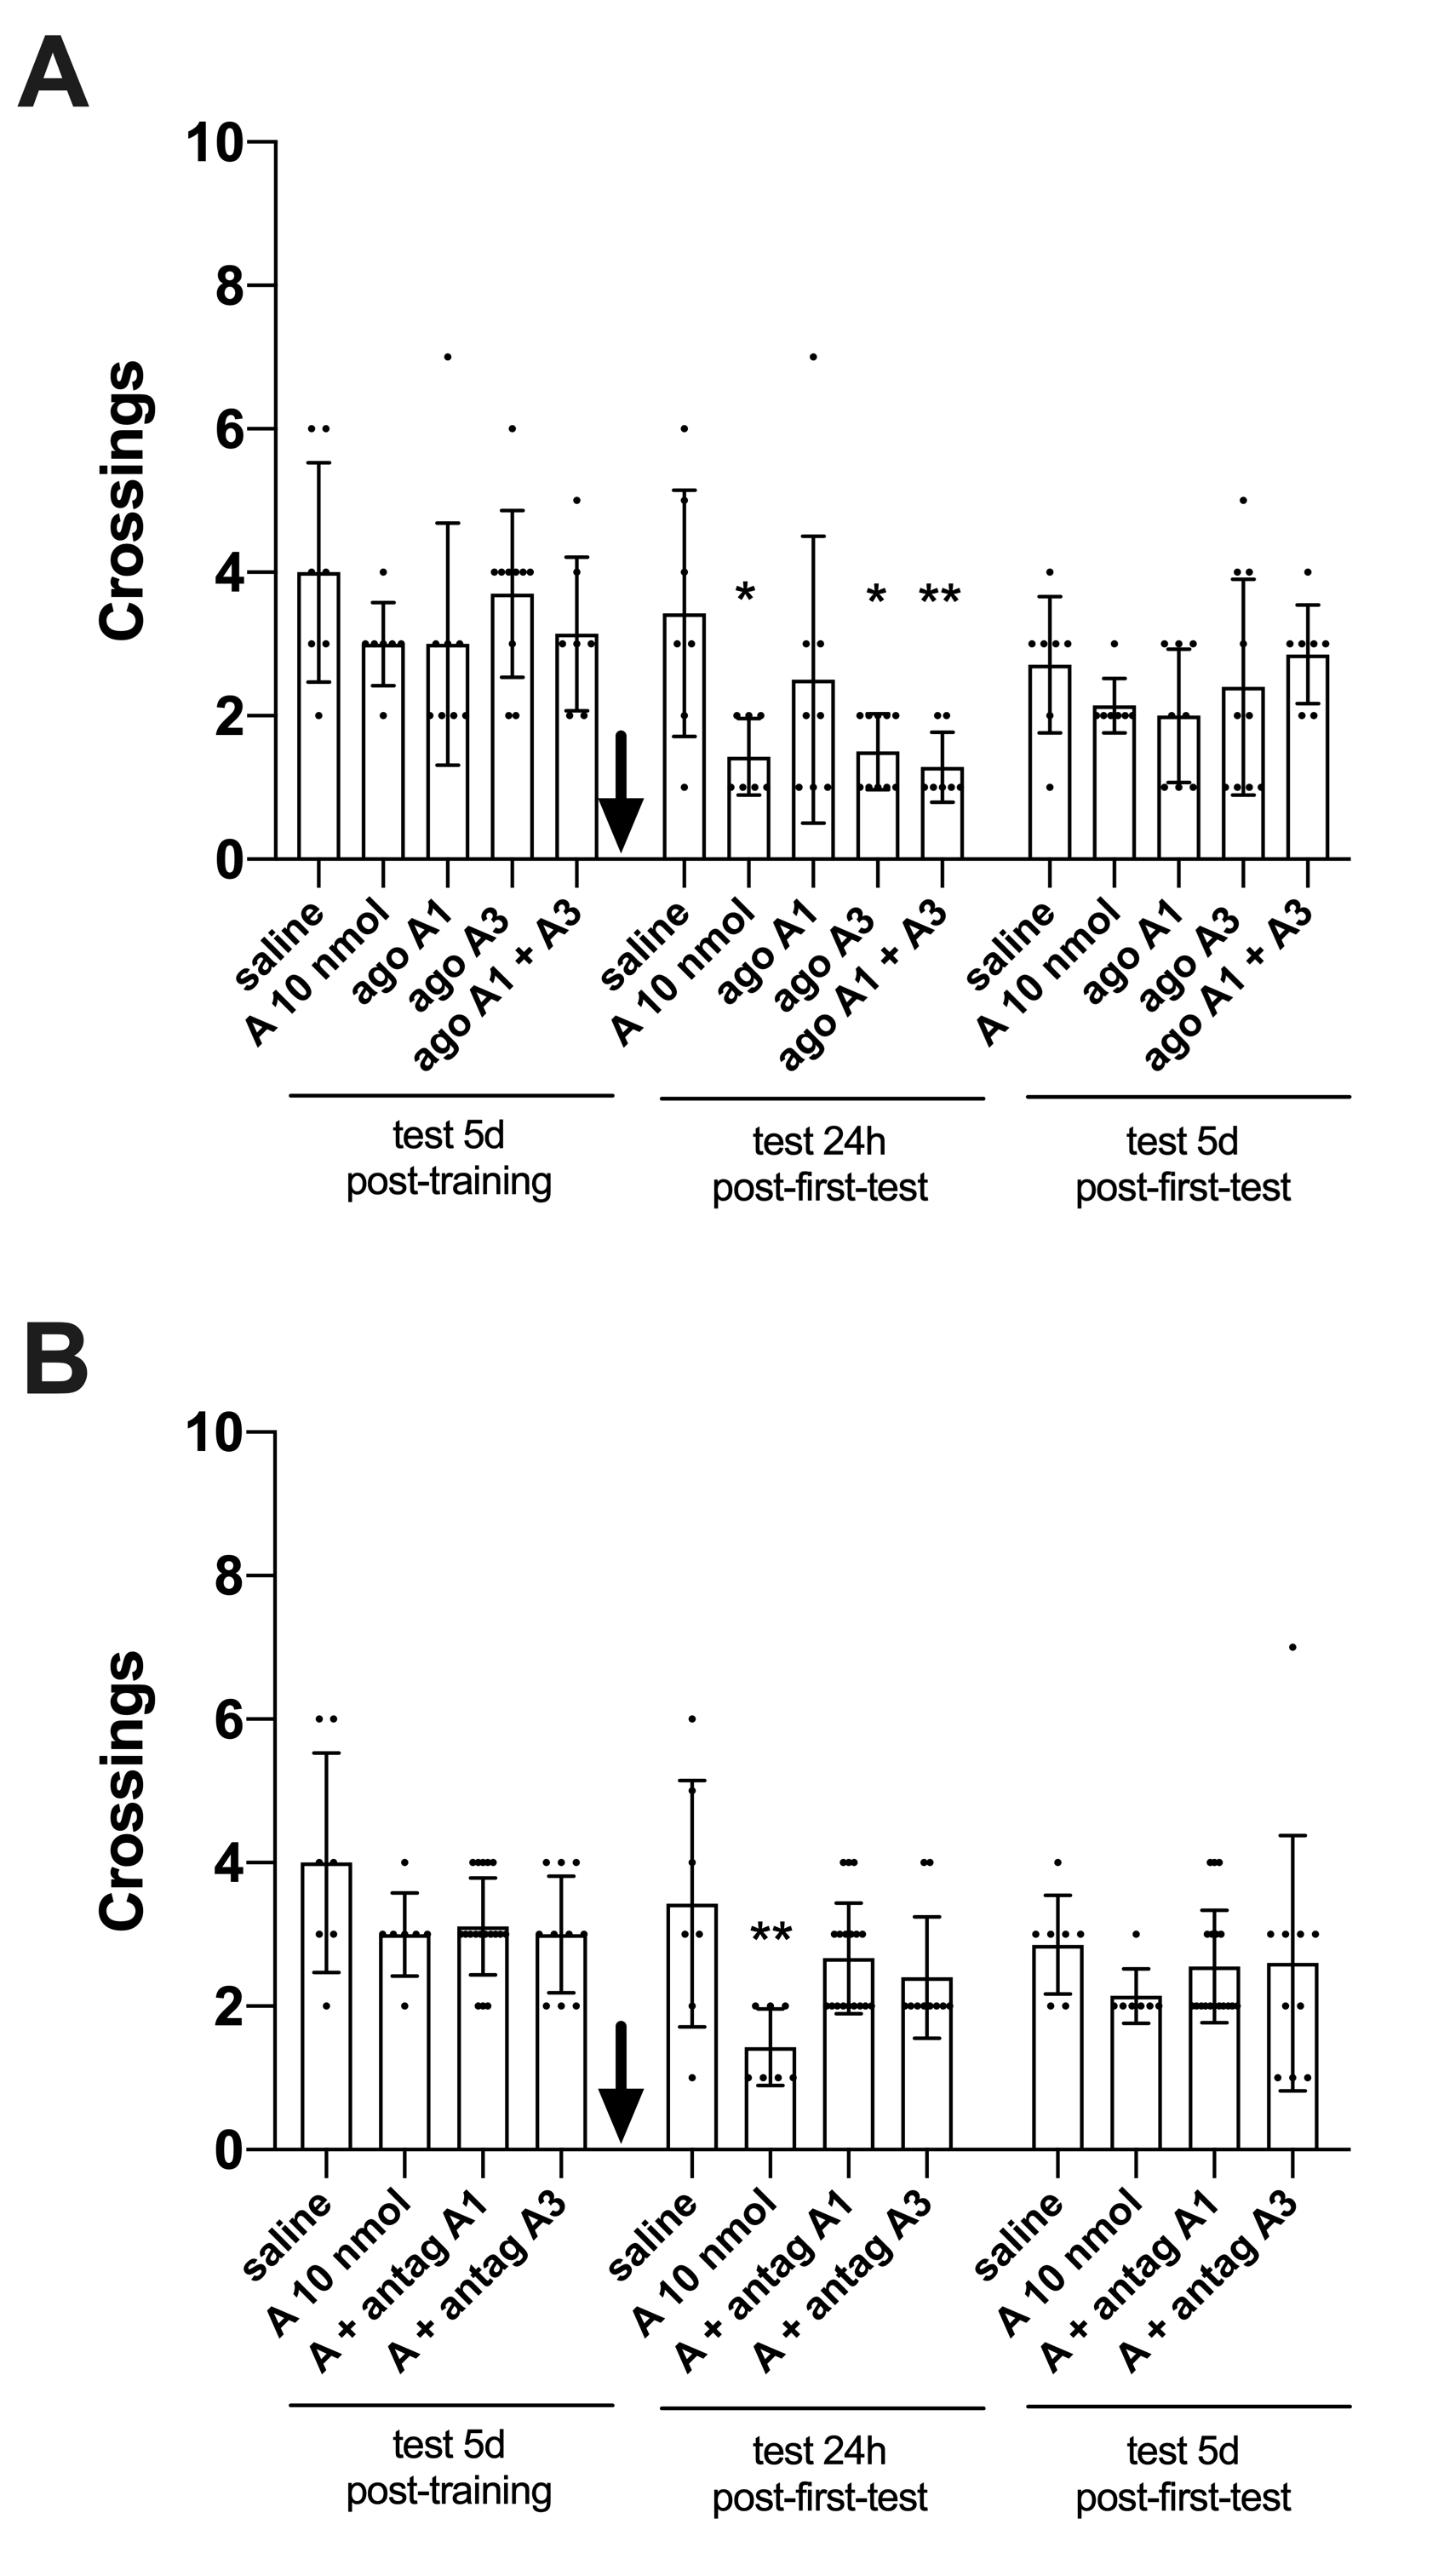


**Figure S6**. **A**.Intrahippocampal infusion of adenosine or receptor agonist A3 immediately after a late nonreinforced retrieval hinders recent but not late spatial memory retention as measured 24 h and 5 d after infusion. Male Wistar rats with infusion cannulae implanted into the CA1 region of the dorsal hippocampus were trained during 5 d in the spatial version of the MWM. Five days after the last training session, the animals were submitted to a 60-s probe test in the absence of the escape platform. Immediately after this first test, the animals received intrahippocampal bilateral infusions (black arrow) of either saline solution (saline), adenosine (A 10 nmol), A1 (ago A1), A3 (ago A3) or A1 plus A3 (ago A1 + A3) receptor agonist, 10 nmol each agonist. Memory retention was assessed in sucessive 60-s probe tests carried out either 24 h or 5 d after the first test. Data are expressed as means (± SD) of the number of crossings on the platform local. Dots: individual value for each rat. *P < 0.05, **P < 0.01 vs. respective Saline group, one-way ANOVA: test 24h post-first-test, F(4, 34) = 4.079;test 5d post-first-test, F(4, 34) = 0.9310; Dunnett’s post test; n = 7–10 per group. **B**. The amnesic effect on late reconsolidation induced by the intra-hippocampal infusion of adenosine is blocked by A1 and A3 receptor antagonists. Male Wistar rats with infusion cannulae implanted into the CA1 region of the dorsal hippocampus were trained during 5 d in the spatial version of the MWM. Five days after the last training session, the animals were submitted to a 60-s probe test in the absence of the escape platform. Immediately after this first test, the animals received intrahippocampal bilateral infusions (black arrow) of either saline solution (saline), adenosine 10 nmol (A 10 nmol) or adenosine 10 nmol plus A1 (A + antag A1) or A3 (A + antag A3) receptor antagonist, 50 nmol each antagonist. Memory retention was assessed in sucessive 60-s probe tests carried out either 24 h or 5 d after the first test. Data are expressed as means (± SD) of the number of crossings on the platform local. Dots: individual value for each rat. **P < 0.01 vs. respective Saline group, one-way ANOVA: test 24h post-first-test, F(3, 38) = 5.178;test 5d post-first-test, F(3, 38) = 0.5494; Dunnett’s post test; n = 7–18 per group.


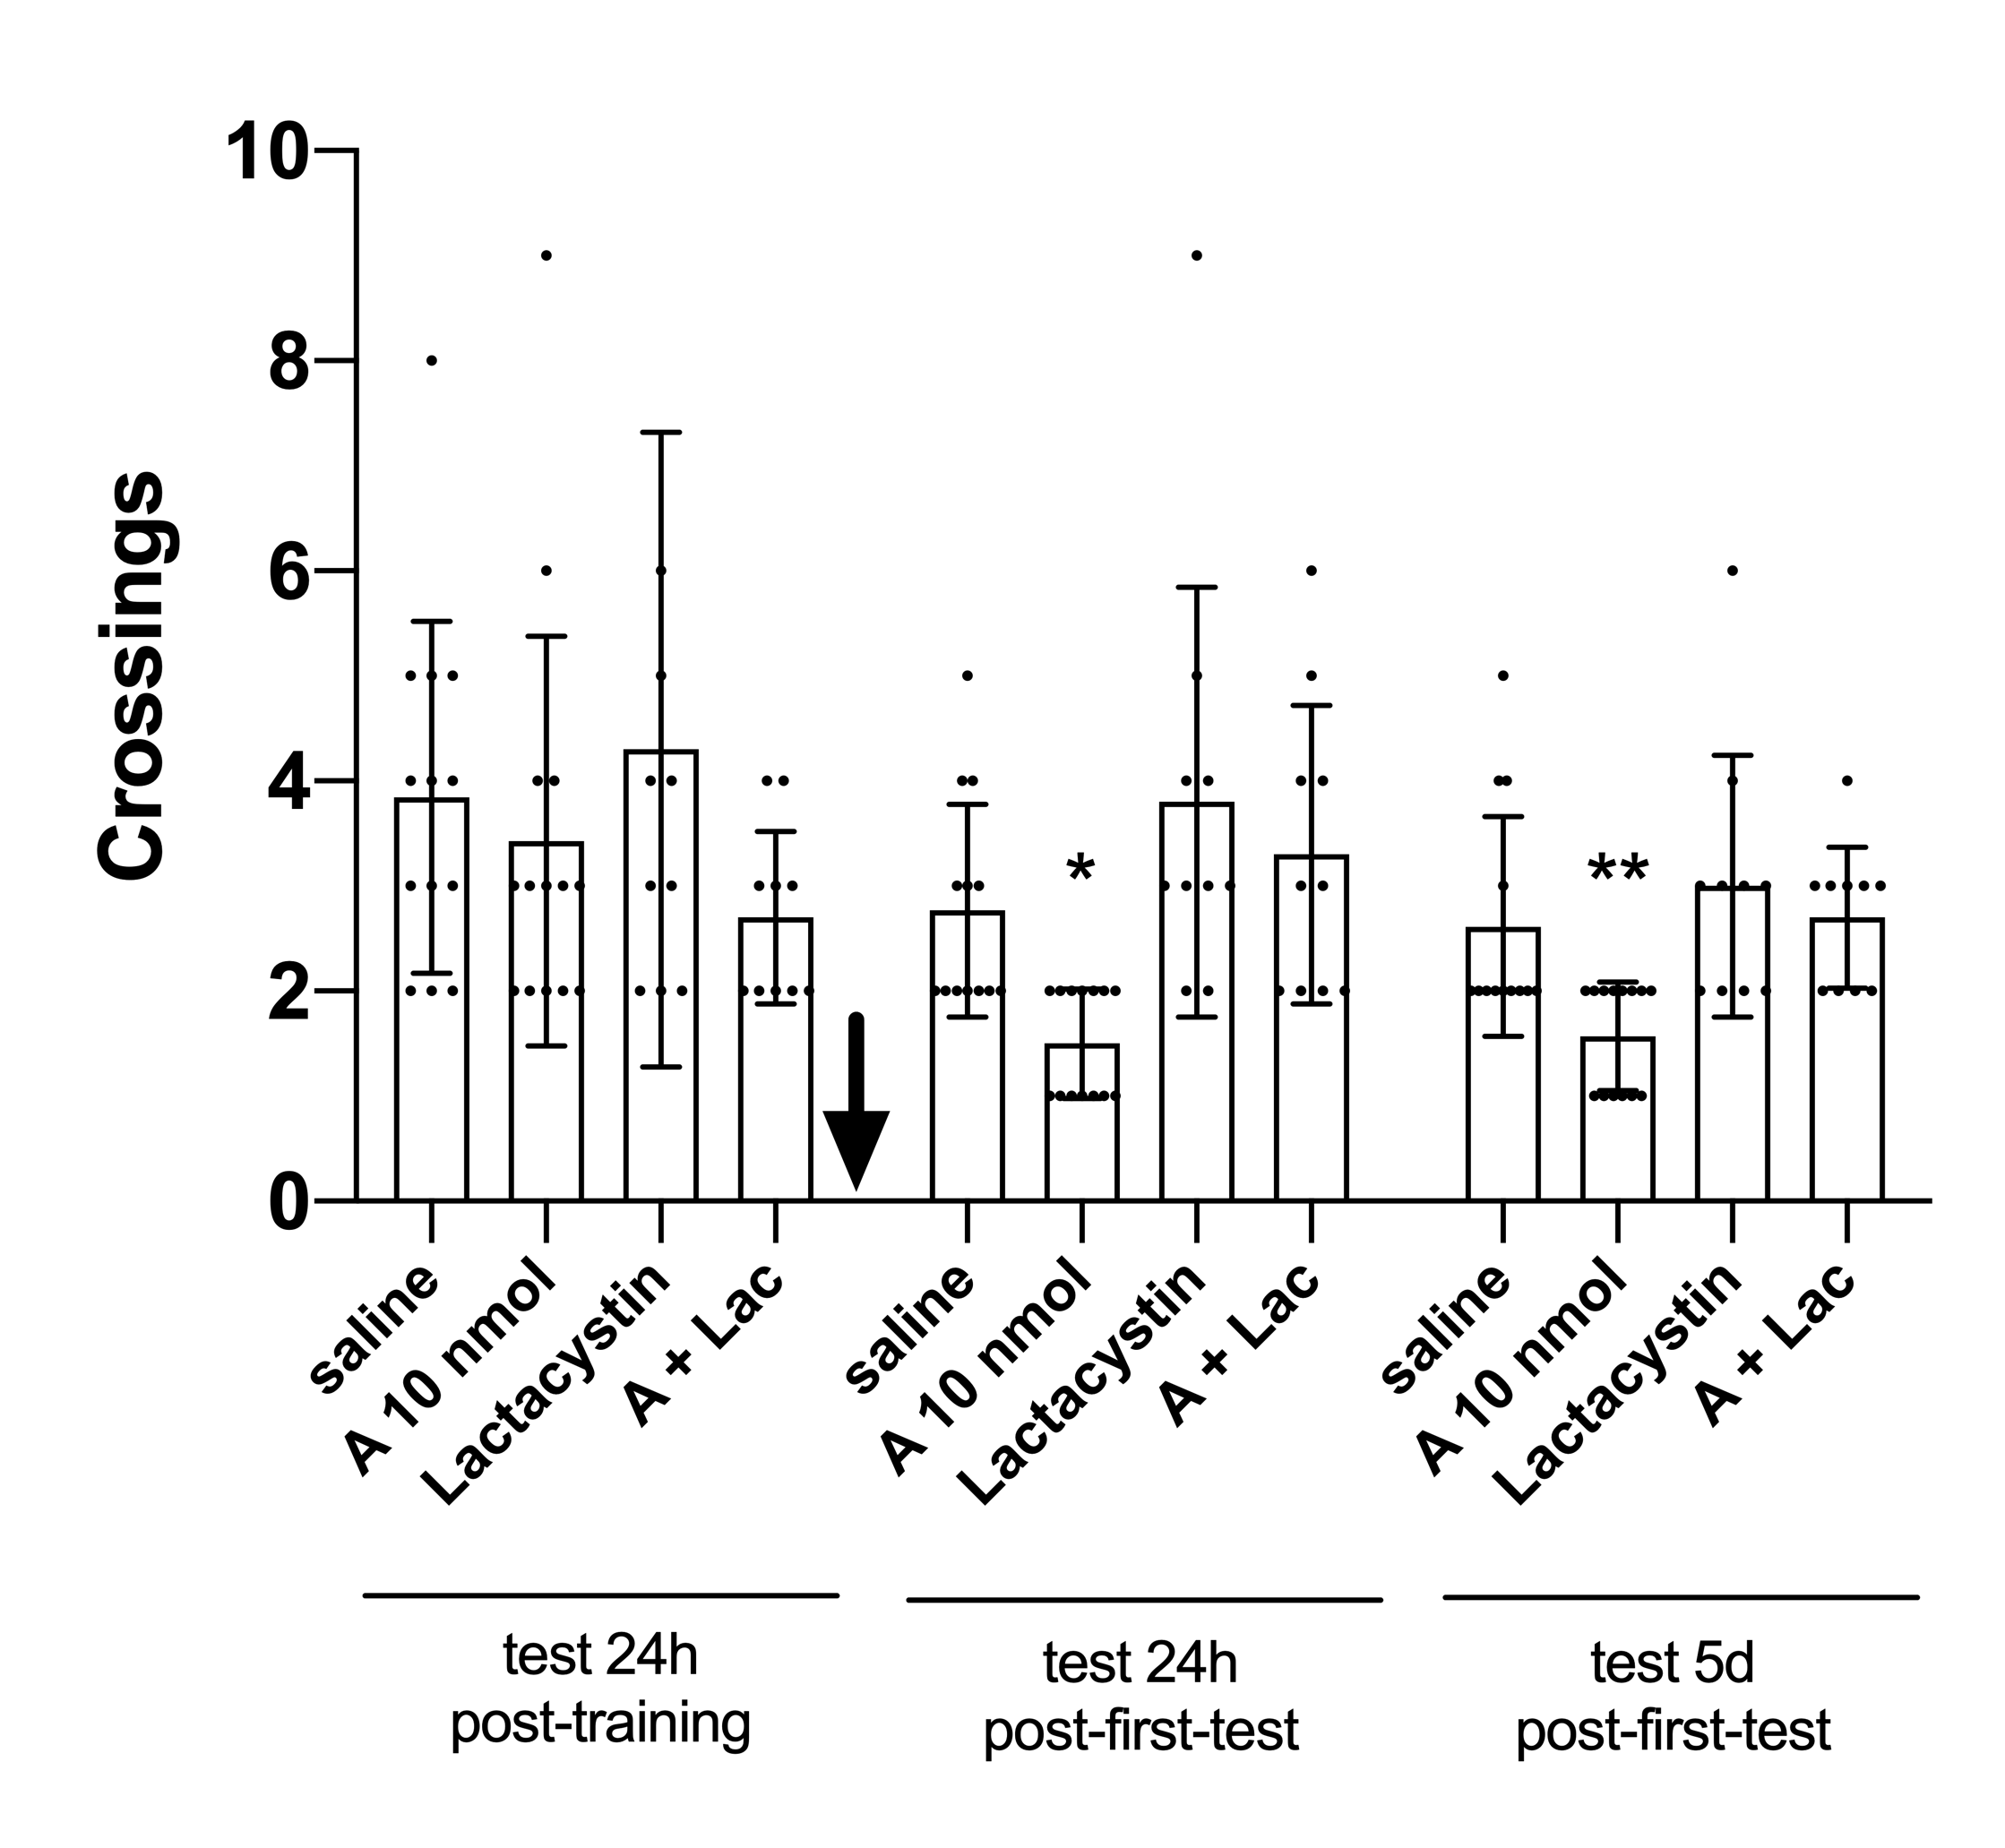


**Figure S7**. The amnesic effect on early reconsolidation induced by the intra-hippocampal infusion of adenosine is blocked by the proteasome inhibitor lactacystin. Male Wistar rats with infusion cannulae implanted into the CA1 region of the dorsal hippocampus were trained during 5 d in the spatial version of the MWM. Twenty-four hours after the last training session, the animals were submitted to a 60-s probe test in the absence of the escape platform. Immediately after this first test, the animals received intrahippocampal bilateral infusions (black arrow) of either saline solution (saline), adenosine 10 nmol (A 10 nmol), lactacystin 200 pmol (Lactacystin) or adenosine 10 nmol plus lactacystin 200 pmol (A + Lac). Memory retention was assessed in sucessive 60-s probe tests carried out either 24 h or 5 d after the first test. Data are expressed as means (± SD) of the number of crossings on the platform local. Dots: individual value for each rat. *P < 0.05, **P < 0.01 vs. respective Saline group, one-way ANOVA: test 24h post-first-test, F(3, 40) = 7.195;test 5d post-first-test, F(3, 40) = 6.094; Dunnett’s post test; n = 7–14 per group.


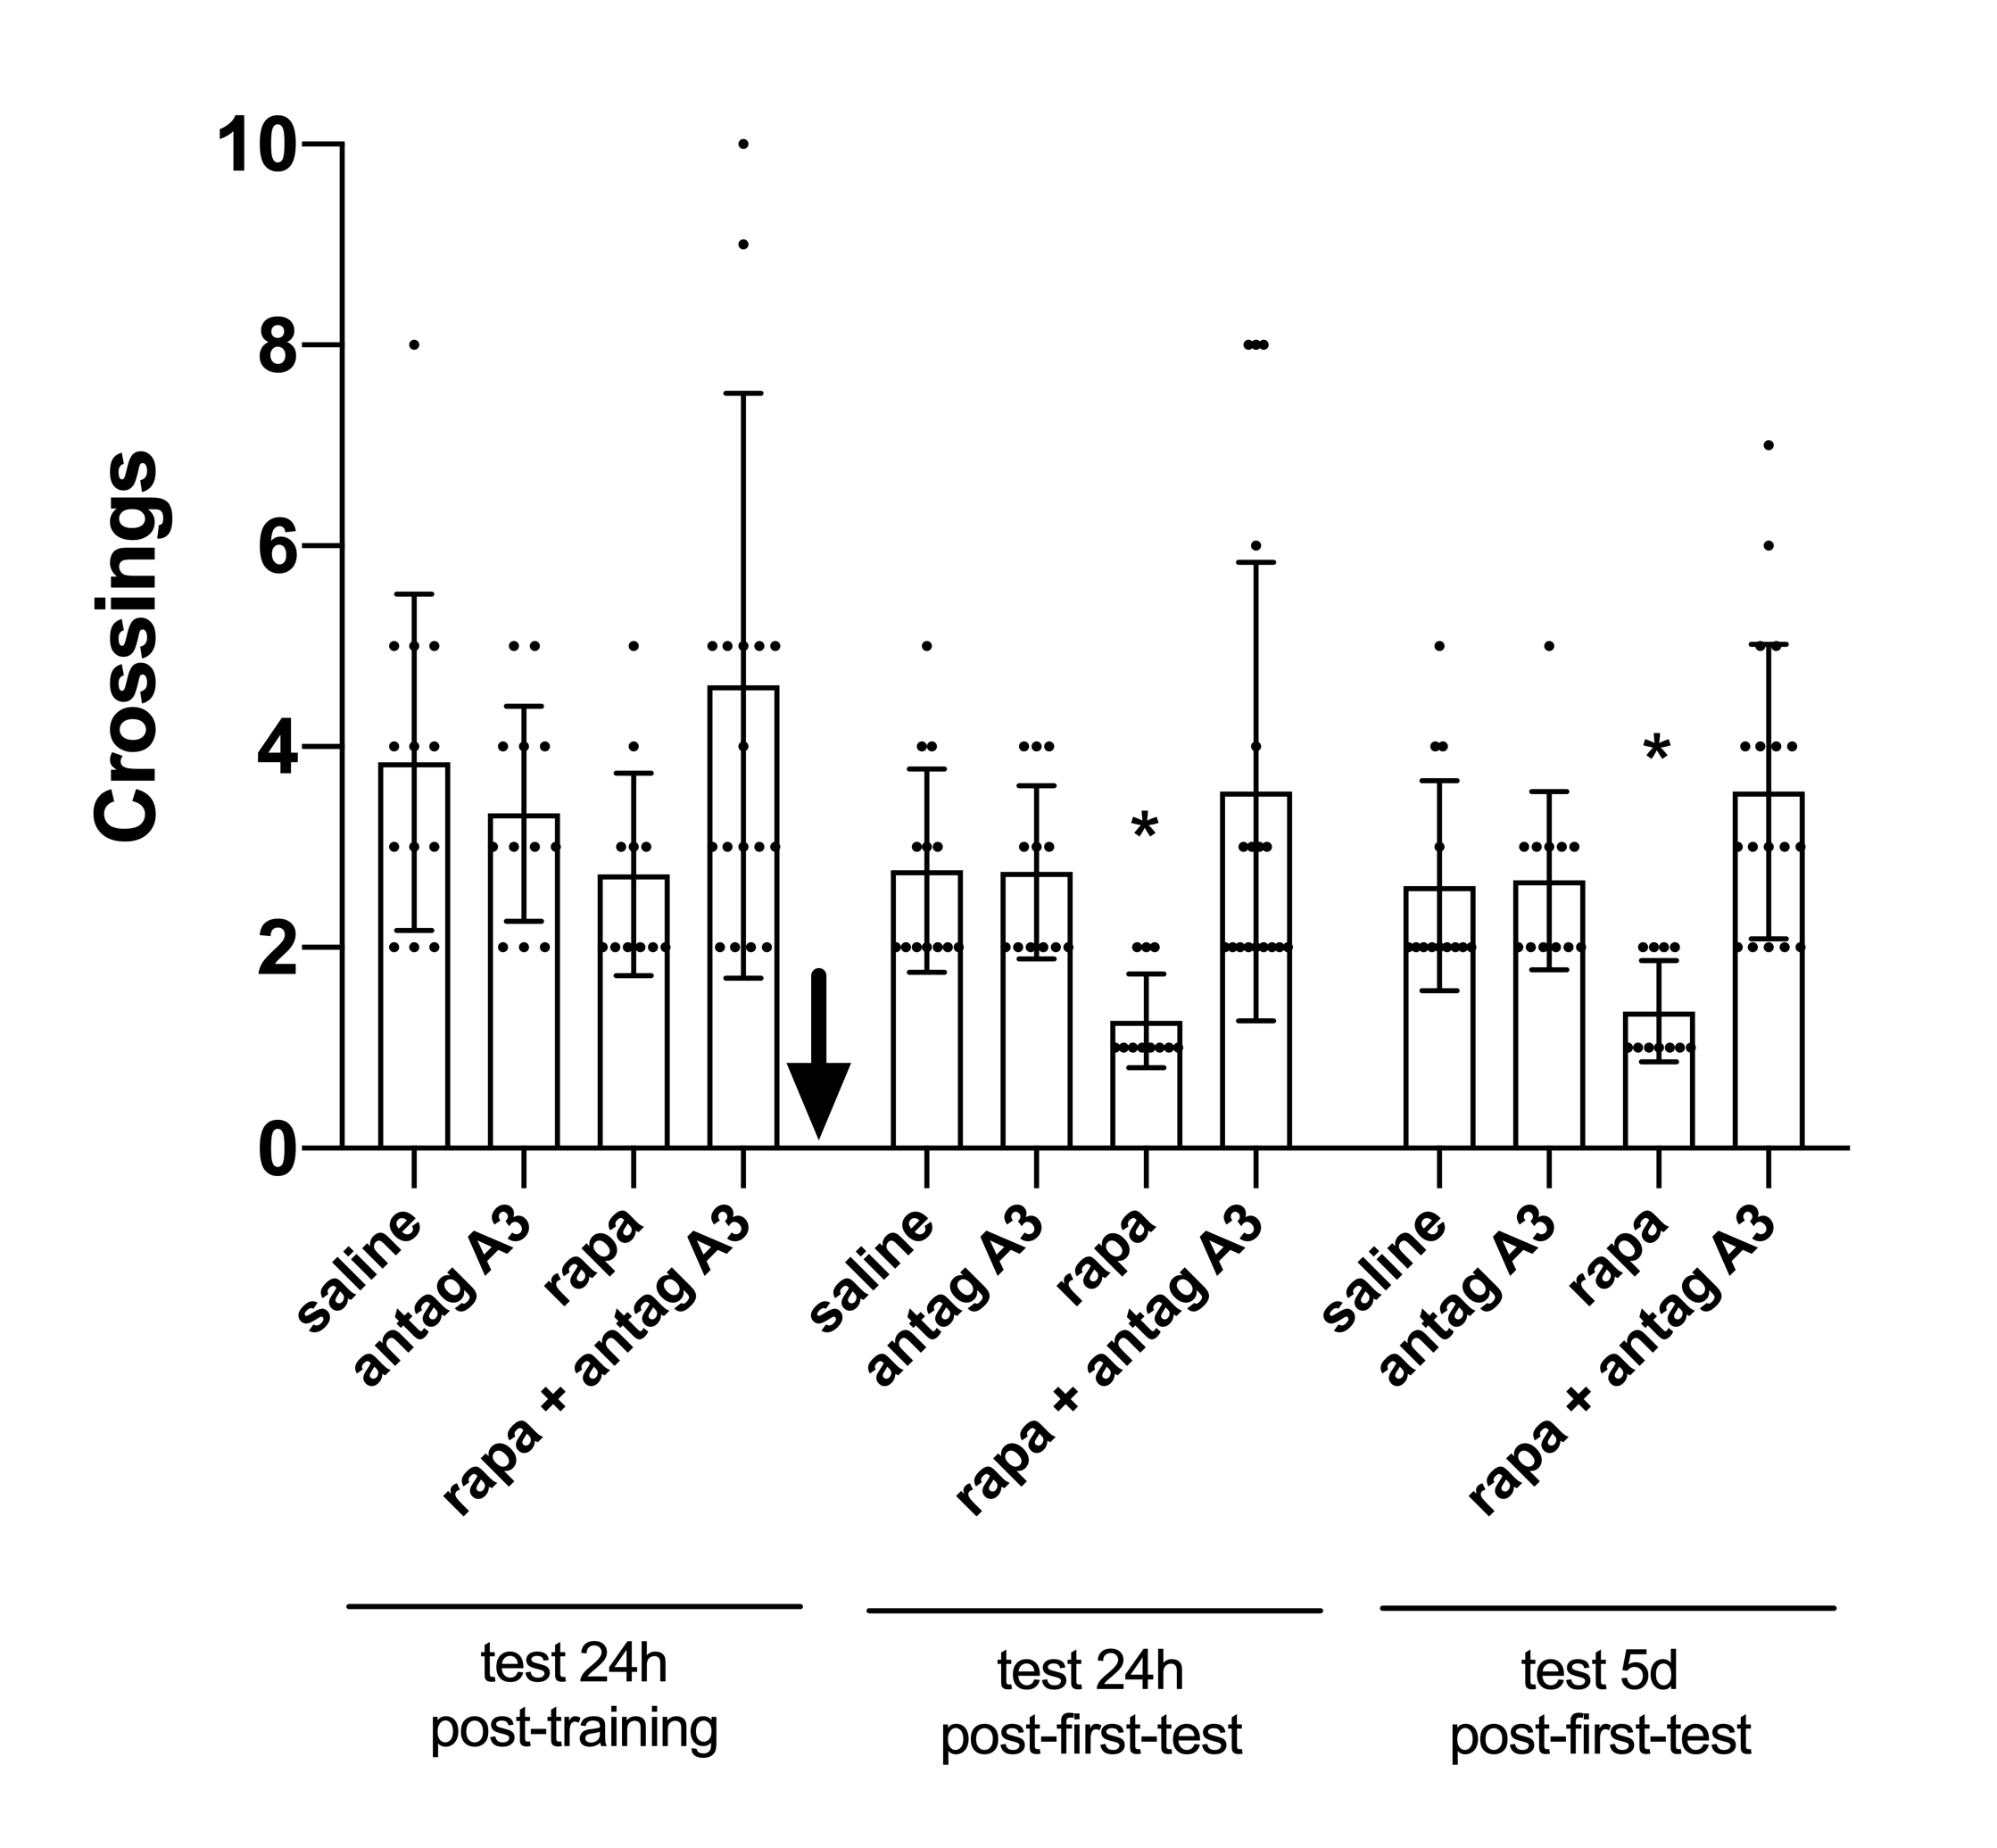


**Figure S8**. The amnesic effect on early reconsolidation induced by the intra-hippocampal infusion of rapamycin is blocked by the adenosine receptor A3 antagonist. Male Wistar rats with infusion cannulae implanted into the CA1 region of the dorsal hippocampus were trained during 5 d in the spatial version of the MWM. Twenty-four hours after the last training session, the animals were submitted to a 60-s probe test in the absence of the escape platform. Immediately after this first test, the animals received intrahippocampal bilateral infusions (black arrow) of either saline solution (saline), adenosine receptor A3 antagonist 50 nmol (antag A3), rapamycin 5 mg (rapa) or A3 receptor antagonist plus rapamycin 5 mg (rapa + antag A3). Memory retention was assessed in sucessive 60-s probe tests carried out either 24 h or 5 d after the first test. Data are expressed as means (± SD) of the number of crossings on the platform local. Dots: individual value for each rat. *P < 0.05 vs. respective Saline group, one-way ANOVA: test 24h post-first-test, F(3, 50) = 5.344;test 5d post-first-test, F(3, 50) = 9.033; Dunnett’s post test; n = 11–18 per group.
